1  
2  
3  
4  
5  
6  
7  
8  
9  
10  
11  
12  
13  
14  
15  
16  
17  
18  
19  
20  
21  
22  
23  
24  
25  
26  
27  
28  
29  
30  
31  
32  
33  
34

**Autopolyploid establishment depends on life history strategy and the mating outcomes of clonal architecture**

Wendy E. Van Drunen<sup>1,2\*</sup>, and Jannice Friedman<sup>2</sup>

1. Department of Biology, University of Toronto Mississauga, Mississauga, ON, L5L 1C6, Canada
2. Biology Department, Queen’s University, Kingston K7L 3N6, Canada.

\* author for correspondence: [we.vandrunen@gmail.com](mailto:we.vandrunen@gmail.com)

**KEYWORDS:** perenniality, life history, clonal reproduction, polyploid establishment, geitonogamy, unreduced gametes

**RUNNING TITLE:** Perenniality and clonality promote polyploidy

**MAIN TEXT WORD COUNT:** 7981

**LIST OF ELEMENTS:**

- Main text – 6 figures
- Supplementary – 1 table, 12 figures

35 **ABSTRACT**

36 Polyploidy is a significant component in the evolution of many taxa, particularly plant groups.  
37 However, the mechanisms promoting or preventing initial polyploid establishment in natural  
38 populations are often unclear. We develop spatially explicit agent-based simulation models to  
39 explore how perennial life history and clonal propagation influence the early stages of polyploid  
40 establishment. Our models show that polyploid establishment is unlikely among short-lived  
41 plants. Polyploids have increased establishment probability when both diploid and polyploid  
42 lifespans are long, especially when unreduced gamete production is non-zero. Further, polyploids  
43 that combine sexual and clonal reproduction can establish across a wide range of life history  
44 strategies. Polyploid genets containing many, far spreading ramets are most successful, but  
45 genets with tightly clumped ramets have similar establishment probability when pollen dispersal  
46 is local and rates of self-fertilization are high. Clonal architecture has a substantial impact on the  
47 spatial structure of the mixed cytotype population during establishment; altering patterns of  
48 mating within or between cytotypes, the mechanisms through which polyploid establishment  
49 proceeds, and the final composition of the polyploid population after successful establishment.  
50 Overall, our findings provide insight into the complex relationship between polyploidy,  
51 perenniality, and clonal reproduction, and offer testable predictions for future empirical work.

52

53

54

## 55 INTRODUCTION

56 Polyploidy has played a key role in the evolutionary history and diversification of plants (Wood  
57 et al. 2009; Husband et al. 2013), and there is growing evidence that it is also common within  
58 many animal clades (Otto and Whitton 2000). Polyploids arise through whole-genome  
59 duplication (WGD) events resulting in more than two complete chromosome sets in an  
60 individual, which may occur through the hybridization of two species (allopolyploidy) or within  
61 a single species (autopolyploidy). Because a WGD event can result in instant reproductive  
62 isolation and drastic phenotypic change between a polyploid and its progenitors (Baack et al.  
63 2015), polyploidy is often viewed as one of the quintessential examples of sympatric speciation.  
64 Indeed, approximately 15% and 30% of speciation events in angiosperms and ferns respectively  
65 have been attributed to polyploidization (Wood et al. 2009). Though polyploidy is prevalent  
66 throughout plants and the wider tree of life, many of the ecological and evolutionary mechanisms  
67 leading to the establishment success or failure of newly formed polyploids in natural populations  
68 are poorly understood (Husband 2000; Ramsey and Ramsey 2014; Soltis et al. 2016*b*).

69 The rate of polyploid formation surely exceeds the rate of successful establishment (Ramsey  
70 and Schemske 2002), because rare polyploids experience significant fitness disadvantages when  
71 they first arise in populations dominated by their lower-ploid parents (Husband 2000; Ramsey  
72 and Schemske 2002). Here, the majority of the polyploid mating opportunities are intercytotype,  
73 resulting in inviable odd-ploidy offspring and low fitness, and ultimately polyploid exclusion  
74 from the population (Levin 1975). This process of Minority Cytotype Exclusion (MCE) is  
75 expected to be a significant barrier to polyploid evolution (Thompson and Lumaret 1992;  
76 Husband 2000; Fowler and Levin 2016), and in many ways is analogous to the challenges faced  
77 by a mutant genotype invading a resident population with a lack of compatible mates, or as

78 individuals colonize new habitat (Baack 2005; Pannell et al. 2015). In general, polyploid  
79 establishment is more probable when the effects of MCE are mitigated (Stebbins 1950), which  
80 may occur through: 1) a shift in the balance of intra- vs. intercytotype mating, 2) a reduced  
81 reliance on sexual reproduction, 3) high rates of polyploid formation, or 4) increased persistence  
82 time.

83 The process of polyploid establishment and MCE are challenging to study empirically (e.g.,  
84 Husband 2000; Sutherland et al. 2020), but previous theoretical treatments largely confirm that  
85 polyploid establishment is facilitated by factors contributing to the four MCE-reducing processes  
86 listed above. Studies have identified important roles for self-fertilization (Levin 1975; Rodríguez  
87 1996; Rausch and Morgan 2005), local dispersal (Baack 2005), asexuality (Nakayama et al.  
88 2002; Yamauchi et al. 2004; Spoelhof et al. 2020), elevated unreduced gamete (UG) production  
89 (Felber and Bever 1997; Burton and Husband 2001; Husband 2004), and iteroparity (Rodríguez  
90 1996). Most of these studies have explicitly represented plant systems and autopolyploidy (but  
91 see Fowler and Levin 2016), but even within this framework there remain significant gaps in our  
92 knowledge of the critical early period immediately following polyploid formation (Spoelhof et  
93 al. 2017).

94 A perennial life history strategy and asexual reproduction through clonal propagation have  
95 long been hypothesized to increase polyploid establishment success (Gustafsson 1948; Stebbins  
96 1950; Rodríguez 1996; Chrtek et al. 2017), and both have the potential to reduce MCE via one or  
97 more mechanisms. Perenniality (coupled with iteroparity) increases the persistence of a new  
98 polyploid over several generations and the number of reproductive bouts during an individual's  
99 lifetime, and should increase the likelihood of viable intracytotype mating via self-fertilization  
100 (Gustafsson 1948; Otto and Whitton 2000; Rice et al. 2019). Additionally, perenniality and

101 longer polyploid lifespans may influence the probability that neopolyploid individuals  
102 originating from different WGD events will overlap in time, increasing opportunities for  
103 successful polyploid outcrossing.

104 Unlike perenniality, clonal reproduction directly contributes to polyploid fitness through the  
105 production of clonal offspring. Clonal propagation decreases the probability of complete  
106 polyploid exclusion, and increases the probability of intracytotype mating through  
107 geitonogamous self-fertilization between shoots within a genetic clone (i.e., a genet, comprised  
108 of numerous genetically-identical ramets; Vallejo-Marín et al. 2010). Since mating in plants  
109 generally occurs between near neighbours, the placement and arrangement of ramets can  
110 dramatically alter the sexual fitness of clonal plants by affecting pollen transport within and  
111 between genets (Handel 1985; Vandepitte et al. 2013; Van Drunen et al. 2015). The potential for  
112 geitonogamy to benefit an establishing polyploid is then inherently dependent on both population  
113 spatial structure and clonal architecture. Dense genets with closely packed ramets (i.e., phalanx  
114 architecture; Charpentier 2002; Vallejo-Marín et al. 2010) exhibit high rates of geitonogamous  
115 self-fertilization and little outcrossing. If the costs of inbreeding are low (Husband et al. 2008), a  
116 polyploid with a phalanx strategy can create its own local pocket of same-cytotype mates (Li et  
117 al. 2004; Baack 2005). In contrast, sparse genets with widely dispersed ramets (i.e., guerrilla  
118 architecture Charpentier 2002) should promote intermingling between different genets and  
119 mating via outcrossing. A guerrilla architecture and a high capacity for lateral growth could  
120 promote the spread of polyploids throughout a population (Van Drunen et al. 2015; Herben et al.  
121 2017), and may be a better strategy if inbreeding depression is high. Thus, though either type of  
122 clonal architecture could promote polyploid establishment, the pathway to establishment could  
123 be fundamentally different between strategies. However, only a handful of polyploid

124 establishment models include spatial or population structure (Li et al. 2004; Baack 2005;  
125 Spoelhof et al. 2020; Griswold 2021), and none have considered the effects of geitonogamy or  
126 clonal architecture.

127 Evaluating the influence that perenniality or clonality have on polyploid establishment is  
128 complicated by the correlations amongst these traits. At a broad scale, phylogenetic and  
129 biogeographical studies have demonstrated a positive evolutionary association between  
130 polyploidy and perenniality or clonality (Gustafsson 1948; Herben et al. 2017; Rice et al. 2019;  
131 Van Drunen and Husband 2019), but these relationships may be confounded by the fact that all  
132 clonal plants are perennial, and that the perennating organs of many plants are themselves clonal  
133 modules (e.g., tillering grasses; Klimeš et al. 1997). Thus, the relative importance of perenniality  
134 and clonality, and their potential interactions, during the initial stages of polyploid evolution are  
135 not well-defined.

136 Successful polyploid establishment generally requires some difference between cytotypes  
137 that conveys a benefit to the polyploids (Levin 1975), an idea corroborated by classic two-  
138 species coexistence theory (reviewed in Barabás et al. 2018). Many models incorporate this  
139 through niche shifts reducing competition between cytotypes (e.g., Rodríguez 1996), or by  
140 directly setting polyploid fitness higher than that of diploids (e.g., Baack 2005). Relatively few  
141 explicitly explore other phenotypic differences between cytotypes (but see Rausch and Morgan  
142 2005; Chrtek et al. 2017; Griswold 2021), though in practice WGD can result in sweeping  
143 changes to gene expression (Levin 2002; Soltis et al. 2016a), physiology (Maherali et al. 2009;  
144 Anneberg and Segraves 2020), or morphology in new polyploids (Husband et al. 2016). WGD is  
145 expected to produce bigger cells with long cell cycles, which should slow development, delay  
146 maturity, and potentially increase lifespan (Bennett 1972; Levin 2002; Beaulieu et al. 2008;

147 Blomme et al. 2014), resulting in polyploids that are more perennial than diploids. The  
148 immediate effects of WGD on clonal reproduction are less predictable. Newly synthesized  
149 polyploids can be more or less clonal than diploids (Van Drunen and Husband 2018a, 2018b;  
150 Walczyk and Hersch-Green 2019), and established polyploids also show a similarly variable  
151 relationship with clonality (e.g., Hroudová and Zákřavský 1993; Keeler 2004; Baldwin and  
152 Husband 2013). In any case, we may hypothesize that an increase in clonal reproduction will aid  
153 polyploid establishment, while a decrease will almost certainly ensure failure for a polyploid  
154 among highly clonal diploids.

155 Theory is a valuable tool in exploring the elusive early steps in polyploid evolution, and for  
156 understanding how the traits implicated in these high-level patterns might causally influence key  
157 individual- and population-level processes. Here, we explore the effects of perenniality and  
158 clonal reproduction on the early stages of autopolyploid establishment using spatially explicit,  
159 agent-based simulation models incorporating the complex dynamics between reproductive  
160 strategy, perenniality, and population spatial structure. Specifically, we ask: 1) Does a perennial  
161 life history increase polyploid establishment? 2) Does clonal reproduction increase polyploid  
162 establishment? 3) How is polyploid establishment influenced by genet size and architecture? and  
163 4) Do differences in life history or reproductive strategy between polyploids and diploids further  
164 influence these processes?

165

## 166 **METHODS**

### 167 *MODEL OVERVIEW:*

168 Models were written in R v3.6.2 (R Development Core Team 2019), the full code is available  
169 online (<https://github.com/wevandrunen/autopolyploid-establishment-lifecycles>-

170 [clonalarchitecture](#)). Simulations take place on a square population lattice measuring  $D \times D$  units.  
171 The population lattice exhibits periodic boundary conditions, such that pollen, seed, or clonal  
172 ramets that disperse beyond the grid limits in one direction re-enter the population on the  
173 opposite edge (i.e., the grid is toroidal). Individuals occupy all cells in the lattice, and population  
174 size ( $N = D \times D$ ) is constant over each generation. Models are initialized with  $N - 1$  diploid  
175 individuals, and a single tetraploid individual at a random location. The population then  
176 undergoes a series of biological processes over a set number of time-steps, equivalent to growing  
177 seasons or generations. For each generation, the sequence of events is: sexual and clonal  
178 reproduction, survival, and offspring recruitment (fig. 1).

179 We make several assumptions about the equivalency of diploid vs. tetraploid individuals.  
180 Cytotypes are equal competitors and occupy the same ecological niche, and diploids and  
181 tetraploids have equal seed germination and ramet establishment probability. Finally, individual  
182 fecundity and survival are not age related; individuals reproduce sexually and asexually  
183 immediately upon recruitment into the population, have a fixed reproductive output per  
184 generation, and have a constant probability of survival to the next generation over their lifetime.

185

#### 186 *STEP 1 – REPRODUCTION:*

187 The first step in each generation is pollen dispersal and ovule fertilization (fig. 1). All individuals  
188 are hermaphroditic and produce  $ov$  ovules per generation (fig. 1). Pollen production is unlimited  
189 and no ovule is left unfertilized, but not all fertilizations will result in viable seed (see below).  
190 Ovule fertilization proceeds by first determining the pollen density from each individual in the  
191 population at the location of the ovule source, including pollen produced by the ovule source  
192 itself. Pollen dispersal is described by Gamma distribution  $P(x)$  (eq. [1]) with shape parameter  $\beta$



193 set to 1, corresponding to leptokurtic pollen distribution (fig. S1A; figs. S1–S12 and table S1 are  
194 available online) where pollen density is highest at the pollen source ( $x = 0$ ).

$$195 \quad P(x), S(x) = \alpha^\beta x^{\beta-1} \frac{e^{-\alpha x}}{\Gamma(\beta)} \quad (1)$$

196 The rate parameter  $\alpha$  is calculated as  $\beta/d_p$ , where  $d_p$  is the average pollen dispersal distance  
197 (fig. 1). Due to the toroidal shape of the population grid, pollen from an individual could arrive at  
198 a location through multiple routes, and we calculate pollen densities using the shortest distance  
199 between the pollen donor and ovule source. The selected pollen donor for each ovule is chosen  
200 by the weighted pollen probability density at the ovule location. All pollen is assumed to be  
201 equally able to fertilize an ovule: there is no pollen precedence, female mate choice, or  
202 performance differences between reduced (1n) and unreduced (2n) pollen.

203 The outcome of each mating event, and seed viability, is determined by the identity of the  
204 gamete sources. A mating event may result in one of 22 cross-types, that fall into four categories  
205 per cytotype: within shoot self-fertilization (autogamy), between ramet self-fertilization  
206 (geitonogamy), intercytotype outcrossing, and intracytotype outcrossing (table S1). Rates of self-  
207 fertilization vs. outcrossing are therefore emergent properties of the model, determined  
208 intrinsically through pollen donor selection. Self-fertilized seeds are inviable with probability  $k_2$   
209 or  $k_4$  and viable with probability  $(1 - k_2)$  or  $(1 - k_4)$ , for diploids and tetraploids respectively  
210 (table S1, fig. 1), which may be interpreted as early acting inbreeding depression. Diploids  
211 produce unreduced gametes (2n) with probability  $ug$ , and reduced gametes (1n) with probability  
212  $(1 - ug)$  (table S1, fig. 1). Tetraploids make only reduced gametes (2n), and the formation of  
213 ploidy levels higher than tetraploid cannot occur. Intercytotype crosses, or intracytotype crosses  
214 involving unreduced gametes, are viable only when the offspring is tetraploid, and triploidy is  
215 assumed to be lethal (table S1). All seeds produced via intracytotype outcrossing with reduced

216 gametes are viable. After fertilization, all viable seeds are stored in a common pool for  
217 recruitment into the next generation.

218 Individuals can produce a number of clonal ramets in each generation,  $c_2$  for diploids, and  $c_4$   
219 for tetraploids (fig. 1). The  $c_2$  and  $c_4$  parameters are constant throughout a single model run,  
220 though they may differ from each other. For some scenarios,  $c_2$  and/or  $c_4$  are zero, meaning no  
221 ramets are produced by individuals of that cytotype and reproduction is entirely sexual. Ramets  
222 are stored in the same offspring pool as the seeds for the recruitment step.

223

#### 224 *STEP 2 – SURVIVAL:*

225 Diploid and tetraploid individuals within the population survive between generations with  
226 probability  $sv_2$  or  $sv_4$  (fig. 1). For annual life histories these probabilities are zero. For perennials  
227 an average of  $sv_2$  diploid and  $sv_4$  tetraploid individuals survive between generations, and the  
228 remainder of the population, up to  $N$ , is supplemented by new recruits from the available  
229 offspring pool.

230

#### 231 *STEP 3 – RECRUITMENT:*

232 Offspring are recruited onto the sites newly vacated by deceased individuals, and may be either  
233 sexually produced seedlings or clonal ramets. The recruitment process is similar to ovule  
234 fertilization, where the probability of a recruit colonizing a vacant site is calculated as the seed or  
235 ramet density at the site, dispersed from their source locations. Seed probabilities follow the  
236 Gamma function  $S(x)$  (eq. [1]), where  $\beta$  is set to 1 and the rate parameter  $\alpha$  is  $\beta/d_s$ , where  $d_s$  is  
237 the average seed dispersal distance (fig. 1). In contrast, ramet dispersal  $C(x)$  is assumed to  
238 conform to a bell-shaped Gaussian distribution (eq. [2], variance  $\sigma^2 = 0.15$ ; fig. S1B) such that

239 peak probability density occurs at the mean ramet dispersal distance from the parental source  
240 ( $d_{C2}$  or  $d_{C4}$ , fig. 1).

$$241 \quad C(x) = \frac{e^{-(x-d_c)^2/(2\sigma^2)}}{\sqrt{2\pi\sigma^2}} \quad (2)$$

242 Recruitment sites are filled in random order, and offspring are removed from the common  
243 pool following successful recruitment. Since ramet probability density is formulated to be high  
244 relative to seed density at  $x \approx d_c$  from a source plant (fig. S1), clonal recruitment will occur much  
245 more frequently at these distances than seed colonization, mirroring a biologically realistic  
246 scenario where the competitive and establishment ability of ramets is higher than that of  
247 seedlings (Vallejo-Marín et al. 2010). Centering ramet colonization at  $d_c$  results in higher ramet  
248 density at a “spacer distance” away from the primary shoot and imposes strong spatial structure  
249 on clonal genets (e.g., Winkler and Stöcklin 2002). After recruitment, seedlings are assigned new  
250 unique genet IDs, while ramets retain the ID of their parent. Data on the survivors and new  
251 cohort of individuals is passed to the next generation, and the reproduction step begins again.

252

### 253 *PARAMETERIZATION:*

254 There are 15 adjustable parameters in the model (fig. 1). Except where noted, simulations take  
255 place on a square lattice with dimension  $D = 30$  and a population of  $N = 900$ , which remains  
256 constant across generations. Simulations begin with only one polyploid individual ( $t = 1$ ). The  
257 number of ovules produced per individual ( $ov$ ) is five for both diploids and tetraploids, resulting  
258 in 4500 seeds per generation for a population of  $N = 900$ . Under the most restrictive  
259 circumstances for sexual reproduction (i.e., high selfed-seed inviability, limited pollen dispersal,  
260 no unreduced gamete production, and similar cytotype frequencies), trials showed that at least  
261 2000 viable seeds were produced per generation; enough to minimize the possibility of

262 anomalous long-distance dispersal events. Diploid individuals may produce unreduced gametes  
263 (UGs) at frequency  $ug$ , and reduced gametes at frequency  $1 - ug$  (table S1).

264 Two parameters affect the realized amount of self-fertilization: pollen dispersal distance ( $d_p$ )  
265 alters the probability of self-pollination (autogamous or geitonogamous), and selfed-seed  
266 inviability ( $k$ ) alters the probability that self-fertilized offspring are included in the pool of viable  
267 recruits (fig. 1, table S1). We focus on these two parameters because they are expected to be  
268 influential on sexual fitness in clonal plants (Eckert 2000; Van Drunen et al. 2015), where  
269 dispersal distance determines pollen kernel density (fig. S1), and regulates whether pollen is  
270 likely to remain within a ramet, encounter other ramets in the same genet, or encounter ramets  
271 from different genets. We test the effects of nine combinations of  $d_p$  and  $k$  ( $3 \times 3$ ) across different  
272 model scenarios, hereafter referred to as the core dispersal-inviability parameter set. The three  
273 core value for average pollen dispersal distance ( $d_p$ ) were 0.5 grid units (pollen rarely exits the  
274 source cell), 2 (local dispersal), and 5 (far dispersal) (figs. 1, S1). For simplicity, average seed  
275 dispersal distances were assumed to mirror those of pollen ( $d_p = d_s$ ), and are equal between  
276 cytotypes for all simulations. The probability of selfed-seed inviability for diploids ( $k_2$ ) and  
277 tetraploids ( $k_4$ ) took the values 0.1, 0.5, or 0.9 (fig. 1) and were equal in most scenarios, where  
278 larger values indicate stronger inviability or inbreeding depression.

279 The remaining six parameters differentiate the life history and reproductive strategies of  
280 diploid or tetraploid individuals: per generation survival ( $sv_2$  and  $sv_4$ ), clonal ramet production  
281 ( $c_2$  and  $c_4$ ), and average ramet dispersal distance ( $d_{C2}$  and  $d_{C4}$ ) (fig. 1). These parameters are  
282 described in more detail in the following sections.

283

284 *LIFE HISTORY STRATEGY SCENARIOS:*

285 We first examine the effect of perenniality on polyploid establishment in the absence of clonal  
286 reproduction ( $c_2 = c_4 = 0$ ). Diploid and tetraploid individuals may have the same probability of  
287 survival between generations ( $sv_2 = sv_4$ ), or survival probabilities may differ ( $sv_2 \neq sv_4$ ). For  
288 equal strategies,  $sv_2$  and  $sv_4$  ranged from 0 (a short-lived annual strategy with zero survival  
289 probability between generations) to 0.9 (a long-lived perennial strategy with a 90% survival  
290 probability) in increments of 0.1 (fig. 1). For the core dispersal-inviability parameter set, there  
291 were 90 unique scenarios where diploids and polyploids have equal life-histories.

292 Because genome duplication is expected to slow growth rates and increase lifespans, we  
293 only consider tetraploid survival probability exceeding that of diploids, defining a “Tetraploid  
294 Survival Advantage” as  $sv_4 - sv_2$ . Diploid survival probability per generation ranged from 0 to  
295 0.8, while tetraploid survival could take any larger value (e.g., for  $sv_2 = 0$ ,  $sv_4$  can be 0.1 – 0.9).  
296 This results in 45 pairs of  $sv_2$  and  $sv_4$ , and a total of 405 parameter combinations.

297 We ran several additional simulations to determine how alternate model formulations could  
298 influence the effect of life history on tetraploid establishment. For these models, we consider:

299 1) *Low population density* – Imposing a fully occupied grid may misrepresent the population  
300 structure of some plants; more closely resembling a population of long-lived trees than patchy  
301 herbaceous species. Less local competition for recruitment sites may increase polyploid  
302 establishment potential. We reran the full set of 495 life history simulations on a larger  
303 population lattice of  $D = 40$  units with population size constant at  $N = 900$  randomly distributed  
304 individuals, for a ~45% decrease in plant density.

305 2) *Unequal selfed-seed inviability* – Because inbreeding depression is expected to be weaker  
306 in polyploids (Husband and Schemske 1997; Husband et al. 2008), we tested scenarios where the  
307 probability of selfed-seed inviability for diploids was  $k_2 = 0.9$ , and for tetraploids  $k_4$  took lower

308 values in increments of 0.2 (minimum 0.1). For these 4  $k_2$ - $k_4$  pairs, we reran the equal and  
309 unequal life history scenarios described above with pollen-seed dispersal  $d_p = d_s = 0.5$  only (220  
310 total parameter combinations).

311 3) *Non-zero UG production* – We consider values of unreduced gamete production ( $ug$ ) by  
312 diploids of 0.01, 0.05, 0.1, 0.15, and 0.2 (fig. 1). Simulations for equal and unequal life histories  
313 were rerun for a subset of the core dispersal-inviability parameters ( $d_p = d_s = 0.5$ , and  $k_2 = k_4 =$   
314 0.1), for 275 total parameter combinations.

315

### 316 *CLONAL REPRODUCTION SCENARIOS:*

317 Here, we allow diploid and tetraploid ramet production to be non-zero; reproduction occurs both  
318 sexually and clonally. In the equal clonality scenario, both diploids and tetraploids are perennial  
319 ( $sv_2 > 0$ ,  $sv_4 > 0$ ), and produce an equal number of clonal ramets per generation ( $c_2 = c_4 > 0$ ) at  
320 some average distance away from the parent plant ( $d_{c2} = d_{c4} > 0$ ). For both ramet production and  
321 dispersal we consider two values: small vs. large genets ( $c_2 = c_4 = 1$  or 5 ramets produced per  
322 generation) and clumped vs. dispersed clonal architecture ( $d_{c2} = d_{c4} = 0.5$  or 5 mean grid units).  
323 All four combinations of clonal parameters were examined, hereafter referred to as clonal  
324 strategies. For each strategy we include equal and unequal life history strategies, resulting in  
325 1620 parameter combinations over the core dispersal-inviability set.

326 We vary ramet production and clonal architecture separately to determine how differences in  
327 clonality between cytotypes alters polyploid establishment, concentrating on equal life history  
328 strategies only. Keeping ramet dispersal distance (i.e., clonal architecture) equal between  
329 cytotypes ( $d_{c2} = d_{c4} = 0.5$  or 5), there are six combinations of  $c_2$  and  $c_4$ , including  $c_2 = 0$  or  $c_4 = 0$ ,  
330 for a total of 108 scenarios for the core dispersal-inviability parameter set. Similarly, keeping

331 ramet production equal between cytotypes ( $c_2 = c_4 = 1$  or 5) while varying ramet dispersal results  
332 in 18 additional combinations.

333 To test alternate model formulations for the clonal scenarios, we also consider:

334 1) *Exponential ramet dispersal* – Our model implicitly includes a competitive advantage to  
335 clonal ramets over seedling recruits by assuming a normal Gaussian distribution for ramet  
336 dispersal probability (eq. [2]; fig. S1B). We compared our main results with a model where  
337 ramet dispersal follows an exponential density function (eq. [1]; fig. S1A), so that the  
338 recruitment probability at a site  $x$  grid units away from the parent plant is the same for both  
339 sexual and clonal offspring. We reran the full set of equal clonality scenarios (1620 parameter  
340 combinations).

341 2) *Unequal selfed-seed inviability* – We set the probability of selfed-seed inviability for  
342 diploids at  $k_2 = 0.9$ , while for tetraploids  $k_4$  took lower values in increments of 0.2 (minimum  
343 0.1). For these 4  $k_2$ - $k_4$  pairs, we reran the equal clonality and equal life history scenarios  
344 described above, for ramet dispersal with either a Gaussian (432 parameter combinations) or  
345 exponential probability function (432 parameter combinations).

346

#### 347 *MODEL OUTPUT:*

348 Simulations were replicated 20 times for each of the 5175 unique sets of parameters we  
349 investigated, for a total of 103 500 model runs. A replicate could result in three possible  
350 outcomes: exclusion of diploids (fixation of tetraploids), exclusion of tetraploids (fixation of  
351 diploids), or a stable equilibrium that includes both cytotypes. Exclusion of diploids occurs once  
352 tetraploids have replaced all diploids—because tetraploids cannot produce double-reduced  
353 gametes, there is no way for diploids to re-enter the population. Complete exclusion of

354 tetraploids can only occur when UG production is zero; otherwise a low equilibrium frequency  
355 of tetraploids is expected as new tetraploid individuals are occasionally formed via UGs. In this  
356 case, the stability of cytotype coexistence was assessed by examining average tetraploid  
357 frequency over the last 100 generations of the simulation, and deviations of less than 10  
358 individuals per generation over this period were deemed stable. One of the three final states was  
359 generally reached within 100 generations, but we continued simulations for a maximum of 500  
360 generations when unreduced gamete (UG) production was non-zero, to capture rare or delayed  
361 events. To determine the probability of polyploid fixation for a particular parameter set, we  
362 calculated the proportion of replicates that end in each state, and average the number of  
363 generations needed to reach them.

364 For each simulation run, we tracked several demographic and reproductive metrics per  
365 generation, including diploid and tetraploid survivorship, number and average size of diploid and  
366 tetraploid individuals and genets, average local neighbourhood composition (defined as an  
367 extended Moore neighbourhood 2 grid units in each dimension; total 24 surrounding cells not  
368 including the focal cell), local neighbourhood vacancy (total 25 cells including the focal cell), the  
369 total number of offspring of each sexual cross-type produced (table S1), the number of clonal  
370 ramets produced, as well as the number of each offspring type successfully recruited into the  
371 population.

372

## 373 **RESULTS**

### 374 *LIFE HISTORY:*

375 In models with equal survivorship ( $sv_2 = sv_4$ ) between cytotypes and no clonal reproduction,  
376 there was no successful establishment of tetraploids, unless other conditions were also met (e.g.,



377  $ug \neq 0$ ). Under unequal survivorship ( $sv_2 \neq sv_4$ ), tetraploid establishment only occurred under  
378 short pollen and seed dispersal distances ( $d_p = d_s = 0.5$ , high autogamy). Establishment  
379 probability increased when both diploids and tetraploids had high survival, and when tetraploids  
380 had significant survival advantages over diploids (fig. 2A). When selfed-seed inviability was  
381 high ( $k_2 = k_4 = 0.9$ ), tetraploids needed a large survivorship advantage and a survival probability  
382 of at least 0.8 to establish, regardless of diploid survival (fig. 2A). When selfed-seed inviability  
383 was low ( $k_2 = k_4 = 0.1$ ), tetraploids needed a minimum survival advantage of 0.4 when among  
384 annual diploids ( $sv_2 = 0$ ), but only 0.2 when diploids had higher survival probabilities (fig. 2A).  
385 Time to tetraploid fixation was more rapid with larger tetraploid survival advantages, but was not  
386 affected by diploid survival probability; whereas tetraploid exclusion was significantly slower  
387 when tetraploid survival advantage was large and when diploid survival was high (fig. S2).

388 Lower population densities expanded the parameter space that allowed successful tetraploid  
389 establishment (fig. S3A), but tetraploid fixation or exclusion times were longer (figs. S3B, C).  
390 Reducing the inviability of selfed-seed in tetraploids relative to diploids significantly increased  
391 establishment probability (fig. 2B), even when cytotype survival was equal. Times to exclusion  
392 were similar to the equal self-seed inviability simulations, but fixation times were significantly  
393 faster (figs. S4A, B).

394 The rate of unreduced gamete (UG) production was positively associated with tetraploid  
395 fixation probability, with the critical value being between  $ug = 0.15$  and  $ug = 0.2$  when cytotype  
396 life history strategies were equal and pollen-seed dispersal distance was moderate to far ( $d_p = d_s$   
397  $= 2$  or  $5$ ), and this threshold was reduced to  $ug = 0.1$  when  $d_p = d_s = 0.5$  and selfed-seed  
398 inviability was low ( $k_2 = k_4 = 0.1$ ; data not shown). When cytotypes varied in life history  
399 strategy, tetraploids were always successful when  $ug \geq 0.1$  (fig. S5A), unless diploid and

400 tetraploid survival were both very high ( $sv_2 = sv_4 = 0.9$ ), where 500 generations was just shy of  
401 enough time for complete fixation (fig. S6A). When  $ug = 0.05$ , a tetraploid survival advantage of  
402 0.2 resulted in tetraploid establishment across all diploid survival probabilities (fig. 2C), and  
403 when tetraploid advantage was 0.1 establishment success was positively correlated with diploid  
404 survival; low diploid survival resulted in tetraploid establishment only rarely, intermediate  
405 survivals ( $sv_2 = 0.3-0.4$ ) showed a trend towards eventual tetraploid establishment (fig. S6A),  
406 and  $sv_2 \geq 0.5$  always ended in tetraploid fixation in less than 500 generations (fig. 2C). Further  
407 reducing UG production to  $ug = 0.01$  revealed a similar pattern (fig. 2C, Figure 6A). For  
408 simulations that did not proceed towards tetraploid fixation, both cytotypes coexisted with low  
409 tetraploid frequencies of  $\sim 10$  tetraploids per generation (1% of the population) for  $ug = 0.05$ , and  
410  $\sim 2$  (0.2%) when  $ug = 0.01$  (figs. S6A, B). In general, mean time to tetraploid fixation was slower  
411 for more perennial populations, and when tetraploid survival advantage was small, but these  
412 relationships were dependent on  $ug$  value (fig. S5B).

413

#### 414 *CLONAL REPRODUCTION:*

##### 415 *Clonality and Life History Strategy:*

416 Tetraploid establishment probability was higher when individuals were able to reproduce both  
417 sexually and clonally (fig. 3), but the effects of clonality were strongly dependent on genet size  
418 and architecture (small vs. large genets, clumped vs. dispersed ramets). As in the nonclonal  
419 scenarios, establishment increased with both diploid survival and tetraploid survival advantage,  
420 but still no establishment occurred when cytotypes had equal life histories (figs. 3, S7). Large  
421 dispersed clonal strategies had the highest establishment probabilities across parameter space  
422 (fig. 3). Differences between clonal strategies were weaker when pollen and seed dispersal

423 distances were short ( $d_p = d_s = 0.5$ , high autogamy, low geitonogamy), but when pollen and seed  
424 dispersal was far ( $d_p = d_s = 5$ , low autogamy and high geitonogamy) small and clumped genets  
425 were substantially less successful than large and dispersed genets (fig. 3). Selfed-seed inviability  
426 did not influence clonal tetraploid establishment probability (fig. S7), nor did lowering selfed-  
427 seed inviability for tetraploids relative to diploids (fig. S8). Mean time to tetraploid fixation was  
428 faster for all clonal strategies compared to the nonclonal, but there were no consistent differences  
429 in exclusion time (fig. S9). The effects of life history strategy on establishment under the  
430 alternate exponential formulation for ramet dispersal were nearly identical to the nonclonal  
431 scenarios, but with faster time to fixation (fig. S10). Unlike under Gaussian ramet dispersal,  
432 reducing tetraploid selfed-seed inviability compared to diploids increased establishment  
433 probability (fig. S8).

434

#### 435 *Divergent Clonal Strategies:*

436 Tetraploids with fewer ramets than diploids had no establishment success (fig. 4). When  
437 tetraploid ramet production was higher, tetraploid establishment depended on clonal architecture,  
438 pollen and seed dispersal distance, and life history strategy (fig. 4). Increasing pollen and seed  
439 dispersal distances decreased establishment probability, particularly for clumped genets (fig. 4).  
440 Tetraploids with greater survivorship tended to have lower establishment success when the  
441 difference in genet size between cytotypes was large ( $c_2 = 0$ ,  $c_4 = 5$ ; fig. 4), but establishment  
442 was positively correlated with survival when differences were small ( $c_2 = 0$ ,  $c_4 = 1$ ) and genets  
443 were dispersed (fig. 4). Selfed-seed inviability did not affect tetraploid establishment (results not  
444 shown).

445 Tetraploids with clumped clonal architecture could not establish among dispersed diploids,  
446 but dispersed tetraploid genets generally had high establishment success among clumped  
447 diploids (fig. S11). In the latter scenario, tetraploids with large genets were little affected by  
448 pollen and seed dispersal distance, and establishment decreased with survival (fig. S11).  
449 Conversely, for small genets establishment success decreased with increasing pollen and seed  
450 dispersal distance (fig. S11). Here, increasing survival lowered establishment probability when  
451 pollen and seed dispersal was restricted ( $d_p = d_s = 0.5$ ), but enhanced it when pollen and seed  
452 dispersal was far ( $d_p = d_s = 2$  or  $5$ , fig. S11). Selfed-seed inviability did not affect tetraploid  
453 establishment when clonal architecture differed between cytotypes (results not shown).

454

#### 455 *The Mating and Demographic Consequences of Clonal Reproduction:*

456 To illustrate the effects of different clonal strategies on patterns of tetraploid establishment, we  
457 focus on the set of models where  $sv_2 = 0.5$ ,  $sv_4 = 0.9$ ,  $d_p = d_s = 0.5$  or  $5$ ,  $k_2 = k_4 = 0.1$ , and  $ug = 0$ ,  
458 as this combination led to successful establishment in the majority of simulations. Diploids and  
459 tetraploids have equal clonal strategies ( $c_2 = c_4$ ,  $dc_2 = dc_4$ ).

460 Reproductive and clonal strategies substantially influenced the spatial structure of tetraploid  
461 populations, even when overall establishment probabilities were similar (fig. 5A). In the  
462 nonclonal scenarios, tetraploids spread into the diploid population in a tight circle, and at 30  
463 generations only occupied 3-5% of the population (fig. 5B). In comparison, clonal tetraploids  
464 established quicker, with clumped architectures expanded from localized points, and dispersed  
465 architectures quickly establishing across the entire population lattice (fig. 5B). Low ramet  
466 production promoted the establishment of many distinct tetraploid genets, but populations with  
467 high ramet production were often dominated by a few very large genets (fig. 5B).

468 Structural differences between clonal strategies affected patterns of within- vs. between-  
469 cytotype mating during the establishment process, and the timing and location of recruitment of  
470 sexual vs. clonal offspring. For nonclonal tetraploids, when simulations began most ovules were  
471 involved in self-fertilized autogamous or inviable intercytotype matings, and nearly all viable  
472 offspring and recruits were autogamously produced (fig. 6A). As the simulations progressed and  
473 tetraploids increased in number, intracytotype matings and recruits became more common (fig.  
474 6A).

475 All clonal tetraploids experienced early increases in geitonogamous mating (fig. 6B) and  
476 geitonogamous seed production (fig. 6C). When pollen and seed dispersal were restricted ( $d_p = d_s$   
477 = 0.5) autogamy was prevalent, though geitonogamy remained high for large and dispersed  
478 strategies until tetraploid fixation, whereas outcrossed mating was more frequent in small and  
479 clumped genets (fig. 6B). In contrast, when pollen and seed dispersal distances were far ( $d_p = d_s$   
480 = 5) geitonogamous mating was dominant early during establishment, but intercytotype mating  
481 overtook geitonogamy before fixation for all but the large dispersed clonal strategy (fig. 6B).  
482 Sexual offspring were rarely recruited in the clonal scenarios, even when they were more  
483 abundant than ramets (figs. 6C, D). Seedling recruitment frequencies mirrored those of the viable  
484 seedlings available (fig. 6C), and was more common late during the establishment process, under  
485 far pollen and seed dispersal distances ( $d_p = d_s = 5$ ), and for small and clumped clonal  
486 architectures (fig. 6D).

487 Under the alternate exponential formulation for ramet dispersal, tetraploid establishment was  
488 nearly identical to the nonclonal scenario; sexual offspring recruited were mainly the result of  
489 autogamy, and geitonogamy played little to no role (fig. S12). However, clonal ramet

490 recruitment spiked early in establishment, particularly for large and dispersed strategies, but then  
491 remained at a low frequency until tetraploid fixation (fig. S12).

492

## 493 **DISCUSSION**

494 Our results indicate that a perennial life history strategy and clonal reproduction can increase  
495 polyploid establishment potential. However, we find that this is only the case when polyploids  
496 have some advantage over diploids (e.g., higher per generation survival), or when unreduced  
497 gamete production is high, suggesting that the ability to perennate or to produce clonal ramets  
498 may not be enough to overcome Minority Cytotype Exclusion (MCE) in some circumstances. By  
499 investigating how various clonal and life history strategies affects the spatial structure,  
500 demography, and mating patterns within a mixed-ploidy population, we identify mechanisms  
501 that can influence the spread of polyploids into a diploid population. Our model is the first to  
502 incorporate the spatial attributes of clonal architecture and within-genet geitonogamous self-  
503 fertilization, and we find that clonal strategy has a significant effect on the polyploid  
504 establishment process, and major consequences for polyploid population structure.

505

### 506 *PERENNIALITY PROMOTES POLYPLOIDY:*

507 Perennial polyploids should experience weaker Minority Cytotype Exclusion (MCE) pressure  
508 than annual polyploids because lengthening lifespan increases the chances of reproductive  
509 success via self-fertilization, and reduces stochastic loss of all polyploids from the population.  
510 Our model supports these hypotheses and provides mechanistic links behind the broad-scale  
511 associations between polyploids and perenniality (Rice et al. 2019; Van Drunen and Husband  
512 2019), which highlight the importance of spatial structure, temporal dynamics, and chance  
513 during the first few generations after a neopolyploid arises.

514 We find that polyploids are more likely to succeed among longer-lived diploid species,  
515 especially if perennial diploids give rise to polyploids with slightly longer lifespans. Notably, the  
516 polyploid survival advantage needed for consistently successful establishment decreased with  
517 increasing diploid perenniality (fig. 2A). This pattern was driven by the demographic  
518 consequences of 1) competition for space in the population, and 2) drawn-out polyploid  
519 persistence when polyploids, or both cytotypes, were long-lived. When diploids are short-lived,  
520 recruitment sites open up close to the rapidly-cycling diploids, which precludes the initial  
521 recruitment of polyploid offspring and increases the likelihood of stochastic loss of all polyploids  
522 unless they have very high relative survivorship. In contrast, when diploids and polyploids are  
523 both long-lived there is significantly slower population turnover, longer polyploid persistence,  
524 and more potential for polyploid offspring recruitment. However, when population density is low  
525 the conditions under which polyploids can establish are greater (fig. S3). This suggests that in  
526 less competitive environments, polyploid success may be less dependent on the life history  
527 strategy of diploids, in line with previous models showing that ecological niche (Fowler and  
528 Levin 1984; Rodríguez 1996) and physical (Griswold 2021) segregation can facilitate polyploid  
529 establishment, even when individuals have an annual life history strategy.

530 Interactions between the spatial and demographic effects of divergent life history strategies  
531 in mixed-cytotype populations offers a reason why polyploidy is more common in perennial  
532 species – the  $\geq 40\%$  increase in survivorship needed to establish among short-lived diploids in  
533 our model (fig. 2A) may be an unfeasibly large shift in neopolyploids, whereas a survival  
534 probability increase of 20% among long-lived diploids may be more tenable. There are numerous  
535 examples of naturally occurring polyploids that exhibit a life history shift compared to their  
536 diploid relatives. For example, in the mixed-ploidy species *Centaurea stoebe* tetraploids are

537 iteroparous short-lived perennials while diploids are predominantly semelparous annuals (Mráz  
538 et al. 2012), and tetraploid cultivars of *Nasturtium officinale* perennate more easily than diploid  
539 lines (Manton 1935). But few studies have addressed life history changes in perenniality in  
540 neopolyploids (but see Müntzing 1936), limiting our understanding of the strength of the  
541 immediate effects of WGD and phenotypic differences between diploids and polyploids, and the  
542 consequences for polyploid establishment in natural populations. Indeed, here we demonstrate  
543 that autopolyploids are unable to establish among diploids with equal life history strategies  
544 unless they have additional advantages (e.g., significantly lower inbreeding depression), a result  
545 corroborated by previous models (Rodríguez 1996; Chrtek et al. 2017; Spoelhof et al. 2020).

546 Polyploid persistence time was prolonged when diploids and polyploids were highly  
547 perennial, considerably slowing model dynamics by decreasing polyploid death and recruitment  
548 rates (see also Chrtek et al. 2017; Spoelhof et al. 2020). Surveys in natural populations have  
549 found that cytotype frequencies in annual species can fluctuate wildly between growing seasons,  
550 sometimes leading to the complete loss of diploids or polyploids within a population (Čertner et  
551 al. 2017), whereas cytotype coexistence in perennial species may be maintained over many  
552 generations (Lumaret et al. 1987; Keeler 2004; Kao and Parker 2010). Thus, perenniality has  
553 been invoked as a non-adaptive factor promoting cytotype coexistence in nature (Duchoslav et  
554 al. 2010; Hanzl et al. 2014; Hanušová et al. 2019), though it is often unknown whether mixed-  
555 ploidy populations are in stable states, or represent only short snapshots of ongoing competition  
556 and exclusion (Kolář et al. 2017). Our results suggest that perenniality may contribute to an  
557 illusion of stable coexistence for a much longer timeframe than field studies typically encompass  
558 (e.g., (e.g., Čertner et al. 2017; but see Buggs and Pannell 2006). For some perennial scenarios  
559 both cytotypes coexisted for more than 300 generations while moving steadily towards polyploid



560 fixation or exclusion (fig. S2), whereas annual polyploids were typically excluded in 1 or 2  
561 generations. Either end of this temporal spectrum presents challenges for studying neopolyploid  
562 establishment in natural populations, emphasizing the utility of theory in understanding this  
563 process.

564 An extended period of close interaction between perennial diploids and polyploids may have  
565 significant consequences for polyploid evolution during and after establishment. For example,  
566 ongoing intercytotype reproductive events could result in selection for assortative mating,  
567 driving divergence in floral morphology or phenology between diploids and polyploids (Oswald  
568 and Nuismer 2011; Husband et al. 2016). Prolonged intercytotype mating will also promote  
569 polyploid establishment when diploid unreduced gamete (UG) production is nonzero, because  
570 the probability of two UGs giving rise to a viable polyploid offspring in a diploid-diploid cross is  
571  $ug^2$ , but the probability of one UG being involved in a diploid-polyploid cross is  $ug$  (table S1).  
572 Our model is the first to incorporate UG production and perenniality, and we find that a UG  
573 production rate of 1-5% is sufficient to ensure polyploid success when diploids and polyploids  
574 are perennial, providing polyploids also have a small survival advantage (fig. 2C). This is similar  
575 to estimates of UG frequencies in natural populations (0.05-2%; Ramsey and Schemske 1998;  
576 Kreiner et al. 2017), and is substantially lower than the UG production rate of ~17% required for  
577 non-selfing annuals with random mating (Felber 1991; Husband 2004), or 10% for annuals with  
578 self-fertilization and low inbreeding depression (Rausch and Morgan 2005). UG production may  
579 then be less of a limiting step for polyploid formation among perennials where reproductive  
580 events are spread over multiple generations.

581  
582 *CLONALITY INFLUENCES THE ESTABLISHMENT PROCESS:*

583 When all else is equal between cytotypes, simply being clonal is not enough to ensure  
584 establishment success under any scenario we investigated – some small advantage over diploids  
585 is needed (e.g., higher ramet production). In our model, increased clonality confers high  
586 establishment success, as in mixed diploid-tetraploid *Chamerion angustifolium* (fireweed), where  
587 neotetraploids exhibit immediate increases in clonal rootbud production (Van Drunen and  
588 Husband 2018*b*). Conversely, decreased clonal investment in polyploids results in no  
589 establishment (fig. 4), a pattern consistent with the lack of natural cytotype variation in *Fragaria*  
590 *vesca* (woodland strawberry), where artificial neotetraploids have lower stolon production (Van  
591 Drunen and Husband 2018*a*). These remain the only species in which neopolyploid investment  
592 in clonal reproduction has been measured, but if this pattern applies more generally, it would  
593 suggest that the production of clonal ramets is an important factor in polyploid establishment  
594 (Spoelhof et al. 2017).

595 Perenniality and clonal reproduction have both been implicated in polyploid success in  
596 natural populations (Rice et al. 2019; Van Drunen and Husband 2019), but few studies have  
597 contrasted their importance in the early stages of polyploid evolution. Here, we show that  
598 polyploids with a combination of perenniality and clonal reproduction generally have greater  
599 establishment success than polyploids that are strictly sexual. In some scenarios, perenniality  
600 alone was enough to ensure polyploid establishment (e.g., when autogamy was high). While  
601 clonal reproduction did not affect final establishment probability in these simulations, it still  
602 significantly altered the establishment process. For instance, polyploids were able to spread into  
603 the diploid population faster when clonal, even when seedlings and ramets were equal  
604 competitors (fig. S10), but this effect was heavily moderated by clonal strategy. Spoelhof et al.  
605 (2020) speculated that rapid clonal expansion may increase establishment probability, but result

606 in genetically homogeneous polyploid populations. We confirm this outcome, particularly for  
607 clonal strategies that produce many ramets with high lateral spread (fig. 5B). Here, it is possible  
608 that polyploids may enjoy short-term success, but may not survive in the long-term if the lack of  
609 genetic variability in the polyploid population leads to reduced evolutionary potential (Muller  
610 1932; Pan and Price 2002; Barrett 2015; Herben et al. 2016). According to our results, polyploids  
611 conforming to a large-clumped clonal architecture may be the most successful if they spread  
612 quickly while maintaining higher genet diversity than polyploids with more dispersible ramets  
613 (fig. 5B). Nonetheless, spreading architectures may perform well in environments with high  
614 temporal variability or frequent disturbance where slower expansion could result in the stochastic  
615 loss of all polyploids (Čertner et al. 2017), especially if genetic uniformity is counteracted by  
616 recurrent polyploid formation, immigration, or high rates of vegetative somatic mutation  
617 between ramets (Yu et al. 2020).

618 Our model demonstrates that spatial clonal architecture has a large effect on the polyploid  
619 establishment process, but that no single clonal strategy is superior under all circumstances.  
620 Similarly, phylogenetic comparative studies have found mixed support for associations between  
621 particular clonal strategies and polyploid occurrence, depending on the group of species being  
622 studied (Herben et al. 2017; Van Drunen and Husband 2019). Overall, given the wide diversity,  
623 evolutionary lability, and multi-functional nature of clonal modes across the angiosperms  
624 (Herben and Klimešová 2020), it seems unlikely that there is a one-size-fits-all hypothesis  
625 describing the relationship between clonal reproduction and polyploidy. For example, bulbs or  
626 corms (generally “clumped” clonal architectures) are involved in resource storage (Klimeš et al.  
627 1997), which may affect over-winter survival or the timing and extent of sexual reproduction in  
628 the next growing season. Thus, polyploid establishment may indeed be successful due to

629 clonality in species with these strategies, but for significantly different reasons than explored in  
630 our current model.

631

632 *CLONAL ARCHITECTURE & MATING:*

633 Clonal reproduction may enhance polyploid establishment by creating local polyploid majorities  
634 (Baack 2005; Spoelhof et al. 2020), but previous models have overlooked one of the key aspects  
635 of this polyploidy-promoting mechanism: geitonogamous self-fertilization. Geitonogamous self-  
636 fertilization between different flowers on the same plant, or between clonal ramets, is often  
637 regarded as a negative and non-adaptive side-effect of outcrossing (Lloyd 1992; Eckert 2000).  
638 Geitonogamy generally involves mating costs, as it requires the same pollination process as  
639 would occur with outcrossing, but it reduces outcross siring success and results in pollen (Harder  
640 and Barrett 1995; Lau et al. 2008) and seed discounting (Lloyd 1992) when there is any  
641 inbreeding depression. But geitonogamy is rarely considered in the complete absence of  
642 compatible mates, where self-fertilization may be the only recourse for producing viable sexual  
643 offspring. Our model shows that geitonogamous self-fertilization between clonal ramets can  
644 confer a significant fitness advantage to establishing polyploids by enabling them to acquire  
645 same-cytotype mates, revealing a situation where geitonogamy might be adaptive. Here, when a  
646 new polyploid is instantly reproductively isolated from its progenitors, the costs typically  
647 associated with pollen and seed discounting via geitonogamy instead apply to intercytotype  
648 outcrossing that does not produce viable recruits.

649 Rates of geitonogamy are expected to vary with clonal architecture (Charpentier 2002;  
650 Matsuo et al. 2014; Van Drunen et al. 2015). We can clearly see this in our model, where the  
651 long reach of dispersed polyploid genets enables ramet recruitment over a wide area, leading to

652 large genets and high rates of geitonogamy. In contrast, seedlings are equal or better dispersers  
653 than ramets when clonal architecture is clumped (fig. S1), resulting in smaller genets, more  
654 sexual recruits, and more frequent intracytotype outcrossing than geitonogamous self-  
655 fertilization (fig. 6). These mating differences contribute to establishment speed and overall  
656 establishment probability, especially when pollen and seed dispersal distances are long and  
657 sexual reproduction is not dominated by autogamy. Across all clonal strategies, however,  
658 geitonogamy substantially reduced ovule waste to intercytotype mating early in the  
659 establishment process (fig. 6).

660 We might then predict that neopolyploids will experience strong selection on traits that  
661 increase geitonogamy, such as ramet production (Hu et al. 2015), clonal architecture (Van  
662 Drunen and Husband 2018a), or floral display size (Vamosi et al. 2007). But as polyploids  
663 spread throughout the population and intracytotype outcrossing becomes more probably,  
664 selection may reverse and instead favour outcross sexual reproduction. There is some evidence  
665 for this occurring in autotetraploid *Chamerion angustifolium*, where initial WGD-driven  
666 increases in synthetic neotetraploid rootbud production is significantly reduced in naturally-  
667 occurring tetraploids (Van Drunen and Husband 2018b; Walczyk and Hersch-Green 2019). In  
668 our model we saw a shift towards recruiting outcrossed seedlings as polyploids became common  
669 (fig. 6), but we could not evaluate selection on reproductive strategy directly because we did not  
670 include phenotypic trait evolution. Future work that allows for heritable variation in reproductive  
671 strategy and sex allocation, and resource-based trade-offs between reproductive modes could  
672 therefore be particularly insightful.

673 Clonal reproduction and geitonogamous self-fertilization may be less likely to facilitate  
674 polyploid success when pollen is limited and pollen discounting is high (Yamauchi 2006), or

675 when ramet recruitment into the population is low. In our model, we assumed that clonal ramets  
676 were better competitors than seedlings, and so polyploid ramets were recruited much more often  
677 than sexual offspring, even when they were less common in the recruitment pool (fig. 6). In  
678 contrast, when ramets and seedlings were equal competitors in the exponential ramet dispersal  
679 scenarios there were no differences in establishment probability between clonal and nonclonal  
680 polyploids, though fixation times were still substantially shorter (figs. S8, S10). Ramet  
681 competitive superiority is realistic for most clonal species, where ramet recruits tend to be more  
682 common than seedlings within populations (Eriksson 1993; Vallejo-Marín et al. 2010;  
683 Vandepitte et al. 2010; Johnson et al. 2020), but the validity of this assumption may vary for  
684 different taxa, and ecological or demographic conditions. For instance, considering only within-  
685 population processes ignores the role of seedlings in long-distance colonisation events and meta-  
686 populations dynamics (Winkler and Fischer 2001; Griswold 2021; but see Scherrer et al. 2017),  
687 and thus polyploids arising from diploids that occur in patchy habitats might benefit from more  
688 dispersible sexual offspring than locally-restricted clonal propagules.

689

#### 690 *CONCLUSIONS:*

691 Whether perenniality and clonal reproduction promote polyploid establishment depends on  
692 multiple factors, including the phenotypic effects of WGD, local habitat availability, clonal  
693 strategy, mating patterns and pollination system, inbreeding depression, and more. Ultimately,  
694 determining whether the processes in our model occur in natural populations will require fine-  
695 scale genetic data and extensive sampling, and may not be possible in polyploid systems that are  
696 long established. Further models exploring a variety of situations (e.g., clonal vs. sexual  
697 reproduction and polyploid establishment in patchy habitats), and experimental studies involving

698 synthetic neopolyploids or very young natural neopolyploids (e.g., tetraploid *Mimulus guttatus* in  
699 the Shetland Isles; Simón-Porcar et al. 2017) will be key to unraveling the individual and  
700 interactive roles of perenniality and clonality in early polyploid evolution.

701

## 702 **ACKNOWLEDGEMENTS**

703 We thank B.C. Husband for input on study concept. Funding for this study was provided by the  
704 Natural Sciences and Engineering Research Council (NSERC) through a Postdoctoral  
705 Fellowship to W.E.V., and a Discovery Grant to J.F.

706

## 707 **DATA AND CODE AVAILABILITY**

708 All of the code needed to run the simulation model in this article is available online at:  
709 <https://github.com/wevandrunen/autoployploid-establishment-lifecycle-clonalarchitecture>.

710

## 711 **AUTHOR CONTRIBUTION STATEMENT**

712 W.E.V. and J.F. conceived of the study. W.E.V. developed the model, and analyzed the output.  
713 W.E.V. wrote the manuscript with input from J.F.

714

## 715 **LITERATURE CITED**

- 716 Anneberg, T. J., and K. A. Segraves. 2020. Nutrient enrichment and neopolyploidy interact to  
717 increase lifetime fitness of *Arabidopsis thaliana*. *Plant and Soil* 456:439–453.
- 718 Baack, E. J. 2005. To succeed globally, disperse locally: effects of local pollen and seed  
719 dispersal on tetraploid establishment. *Heredity* 94:538–546.
- 720 Baack, E., M. C. Melo, L. H. Rieseberg, and D. Ortiz-Barrientos. 2015. The origins of  
721 reproductive isolation in plants. *New Phytologist* 207:968–984.

- 722 Baldwin, S. J., and B. C. Husband. 2013. The association between polyploidy and clonal  
723 reproduction in diploid and tetraploid *Chamerion angustifolium*. *Molecular Ecology* 22:1806–  
724 1819.
- 725 Barabás, G., R. D’Andrea, and S. M. Stump. 2018. Chesson’s coexistence theory. *Ecological*  
726 *Monographs* 88:277–303.
- 727 Barrett, S. C. H. 2015. Influences of clonality on plant sexual reproduction. *Proceedings of the*  
728 *National Academy of Sciences* 112:8859–8866.
- 729 Beaulieu, J. M., I. J. Leitch, S. Patel, A. Pendharkar, and C. A. Knight. 2008. Genome size is a  
730 strong predictor of cell size and stomatal density in angiosperms. *New Phytologist* 179:975–  
731 986.
- 732 Bennett, M. D. 1972. Nuclear DNA content and minimum generation time in herbaceous plants.  
733 *Proceedings of the Royal Society of London. Series B, Biological Sciences* 181:109–135.
- 734 Blomme, J., D. Inzé, and N. Gonzalez. 2014. The cell-cycle interactome: a source of growth  
735 regulators? *Journal of Experimental Botany* 65:2715–2730.
- 736 Buggs, R. J. A., and J. R. Pannell. 2006. Rapid displacement of a monoecious plant lineage is  
737 due to pollen swamping by a dioecious relative. *Current Biology* 16:996–1000.
- 738 Burton, T. L., and B. C. Husband. 2001. Fecundity and offspring ploidy in matings among  
739 diploid, triploid and tetraploid *Chamerion angustifolium* (Onagraceae): consequences for  
740 tetraploid establishment. *Heredity* 87:573–582.
- 741 Čertner, M., E. Fenclová, P. Kúr, F. Kolář, P. Koutecký, A. Krahulcová, and J. Suda. 2017.  
742 Evolutionary dynamics of mixed-ploidy populations in an annual herb: dispersal, local  
743 persistence and recurrent origins of polyploids. *Annals of Botany* 120:303–315.
- 744 Charpentier, A. 2002. Consequences of clonal growth for plant mating. *Evolutionary Ecology*  
745 15:521–530.
- 746 Chrtek, J., T. Herben, R. Rosenbaumová, Z. Münzbergová, Z. Dočkalová, J. Zahradníček, J.  
747 Krejčíková, et al. 2017. Cytotype coexistence in the field cannot be explained by inter-  
748 cytotype hybridization alone: linking experiments and computer simulations in the sexual  
749 species *Pilosella echioides* (Asteraceae). *BMC Evolutionary Biology* 17:87.
- 750 Duchoslav, M., L. Šafářová, and F. Krahulec. 2010. Complex distribution patterns, ecology and  
751 coexistence of ploidy levels of *Allium oleraceum* (Alliaceae) in the Czech Republic. *Annals*  
752 *of Botany* 105:719–735.
- 753 Eckert, C. G. 2000. Contributions of autogamy and geitonogamy to self-fertilization in a mass-  
754 flowering, clonal plant. *Ecology* 81:532–542.
- 755 Eriksson, O. 1993. Dynamics of genets in clonal plants. *Trends in Ecology & Evolution* 8:313–  
756 316.



- 757 Felber, F. 1991. Establishment of a tetraploid cytotype in a diploid population: Effect of relative  
758 fitness of the cytotypes. *Journal of Evolutionary Biology* 4:195–207.
- 759 Felber, F., and J. D. Bever. 1997. Effect of triploid fitness on the coexistence of diploids and  
760 tetraploids. *Biological Journal of the Linnean Society* 60:95–106.
- 761 Fowler, N. L., and D. A. Levin. 1984. Ecological constraints on the establishment of a novel  
762 polyploid in competition with Its diploid progenitor. *The American Naturalist* 124:703–711.
- 763 Fowler, N. L., and D. A. Levin. 2016. Critical factors in the establishment of allopolyploids.  
764 *American Journal of Botany* 103:1236–1251.
- 765 Griswold, C. K. 2021. The effects of migration load, selfing, inbreeding depression, and the  
766 genetics of adaptation on autotetraploid versus diploid establishment in peripheral habitats.  
767 *Evolution* 75:39–55.
- 768 Gustafsson, Å. 1948. Polyploidy, life-form and vegetative reproduction. *Hereditas* 34:1–22.
- 769 Handel, S. N. 1985. The intrusion of clonal growth patterns on plant breeding systems. *The*  
770 *American Naturalist* 125:367–384.
- 771 Hanušová, K., M. Čertner, T. Urfus, P. Koutecký, J. Košnar, C. J. Rothfels, V. Jarolímová, et al.  
772 2019. Widespread co-occurrence of multiple ploidy levels in fragile ferns (*Cystopteris fragilis*  
773 complex; Cystopteridaceae) probably stems from similar ecology of cytotypes, their efficient  
774 dispersal and inter-ploidy hybridization. *Annals of Botany* 123:845–855.
- 775 Hanzl, M., F. Kolář, D. Nováková, and J. Suda. 2014. Nonadaptive processes governing early  
776 stages of polyploid evolution: Insights from a primary contact zone of relict serpentine  
777 *Knautia arvensis* (Caprifoliaceae). *American Journal of Botany* 101:935–945.
- 778 Harder, L. D., and S. C. H. Barrett. 1995. Mating cost of large floral displays in hermaphrodite  
779 plants. *Nature* 373:512–515.
- 780 Herben, T., and J. Klimešová. 2020. Evolution of clonal growth forms in angiosperms. *New*  
781 *Phytologist* 225:999–1010.
- 782 Herben, T., J. Suda, and J. Klimešová. 2017. Polyploid species rely on vegetative reproduction  
783 more than diploids: a re-examination of the old hypothesis. *Annals of Botany* 120:341–349.
- 784 Herben, T., O. Tackenberg, and J. Klimešová. 2016. Reproduction by seed and clonality in  
785 plants: correlated syndromes or independent strategies? (M. Rees, ed.) *Journal of Ecology*  
786 104:1696–1706.
- 787 Hroudová, Z., and P. Zákavský. 1993. Ecology of two cytotypes of *Butomus umbellatus* II.  
788 Reproduction, growth and biomass production. *Folia Geobotanica & Phytotaxonomica*  
789 28:413–424.

- 790 Hu, Y., S. C. H. Barrett, D. Zhang, and W. Liao. 2015. Experimental analysis of mating patterns  
791 in a clonal plant reveals contrasting modes of self-pollination. *Ecology and Evolution* 5:5423–  
792 5431.
- 793 Husband, B. C. 2000. Constraints on polyploid evolution: A test of the minority cytotype  
794 exclusion principle. *Proceedings: Biological Sciences* 267:217–223.
- 795 ———. 2004. The role of triploid hybrids in the evolutionary dynamics of mixed-ploidy  
796 populations. *Biological Journal of the Linnean Society* 82:537–546.
- 797 Husband, B. C., S. J. Baldwin, and H. A. Sabara. 2016. Direct vs. indirect effects of whole-  
798 genome duplication on prezygotic isolation in *Chamerion angustifolium* : Implications for  
799 rapid speciation. *American Journal of Botany* 103:1259–1271.
- 800 Husband, B. C., S. J. Baldwin, and J. Suda. 2013. The incidence of polyploidy in natural plant  
801 populations: Major patterns and evolutionary processes. Pages 255–276 in J. Greilhuber, J.  
802 Dolezel, and J. F. Wendel, eds. *Plant Genome Diversity Volume 2*. Springer Vienna, Vienna.
- 803 Husband, B. C., B. Ozimec, S. L. Martin, and L. Pollock. 2008. Mating consequences of  
804 polyploid evolution in flowering plants: Current trends and insights from synthetic polyploids.  
805 *International Journal of Plant Sciences* 169:195–206.
- 806 Husband, B. C., and D. W. Schemske. 1997. The effect of inbreeding in diploid and tetraploid  
807 populations of *Epilobium angustifolium* (Onagraceae): Implications for the genetic basis of  
808 inbreeding depression. *Evolution* 51:737.
- 809 Johnson, A. J., R. J. Orth, and K. A. Moore. 2020. The role of sexual reproduction in the  
810 maintenance of established *Zostera marina* meadows. (C. Angelini, ed.) *Journal of Ecology*  
811 108:945–957.
- 812 Kao, R. H., and I. M. Parker. 2010. Coexisting cytotypes of *Arnica cordifolia* : Morphological  
813 differentiation and local-scale distribution. *International Journal of Plant Sciences* 171:81–89.
- 814 Keeler, K. H. 2004. Impact of intraspecific polyploidy in *Andropogon gerardii* (Poaceae)  
815 populations. *The American Midland Naturalist* 152:63–74.
- 816 Klimeš, L., J. Klimešová, R. Hendricks, and J. van Groenendael. 1997. Clonal plant architecture:  
817 a comparative analysis of form and function. in H. de Kroon and J. van Groenendael, eds. *The*  
818 *ecology and evolution of clonal plants*. Backhuys, Leiden, the Netherlands.
- 819 Kolář, F., M. Čertner, J. Suda, P. Schönswetter, and B. C. Husband. 2017. Mixed-ploidy species:  
820 Progress and opportunities in polyploid research. *Trends in Plant Science* 22:1041–1055.
- 821 Kreiner, J. M., P. Kron, and B. C. Husband. 2017. Evolutionary dynamics of unreduced gametes.  
822 *Trends in Genetics* 33:583–593.

- 823 Lau, J. A., R. E. Miller, and M. D. Rausher. 2008. Selection through male function favors  
824 smaller floral display size in the common morning glory *Ipomoea purpurea*  
825 (Convolvulaceae). *The American Naturalist* 172:63–74.
- 826 Levin, D. A. 1975. Minority cytotype exclusion in local plant populations. *TAXON* 24:35–43.
- 827 Levin, D. A. 2002. *The role of chromosomal change in plant evolution*. Oxford University Press.
- 828 Li, B.-H., X.-M. Xu, and M. S. Ridout. 2004. Modelling the establishment and spread of  
829 autotetraploid plants in a spatially heterogeneous environment: Establishment and spread of  
830 autotetraploid plants. *Journal of Evolutionary Biology* 17:562–573.
- 831 Lloyd, D. G. 1992. Self- and cross-fertilization in plants. II. The selection of self-fertilization.  
832 *International Journal of Plant Sciences* 153:370–380.
- 833 Lumaret, R., J.-L. Guillerm, J. Delay, A. Ait Lhaj Loutfi, J. Izco, and M. Jay. 1987. Polyploidy  
834 and habitat differentiation in *Dactylis glomerata* L. from Galicia (Spain). *Oecologia* 73:436–  
835 446.
- 836 Maherali, H., A. E. Walden, and B. C. Husband. 2009. Genome duplication and the evolution of  
837 physiological responses to water stress. *New Phytologist* 184:721–731.
- 838 Manton, I. 1935. The cytological history of Watercress (*Nasturtium officinale* R. Br.). *Zeitschrift*  
839 *für induktive Abstammungs- und Vererbungslehre* 69:132–157.
- 840 Matsuo, A., H. Tomimatsu, J.-I. Suzuki, T. Saitoh, S. Shibata, A. Makita, and Y. Suyama. 2014.  
841 Female and male fitness consequences of clonal growth in a dwarf bamboo population with a  
842 high degree of clonal intermingling. *Annals of Botany* 114:1035–1041.
- 843 Mráz, P., S. Španiel, A. Keller, G. Bowmann, A. Farkas, B. Šingliarová, R. P. Rohr, et al. 2012.  
844 Anthropogenic disturbance as a driver of microspatial and microhabitat segregation of  
845 cytotypes of *Centaurea stoebe* and cytotype interactions in secondary contact zones. *Annals*  
846 *of Botany* 110:615–627.
- 847 Muller, H. J. 1932. Some genetic aspects of sex. *The American Naturalist* 66:118–138.
- 848 Müntzing, A. 1936. The evolutionary significance of autopolyploidy. *Hereditas* 21:363–378.
- 849 Nakayama, Y., H. Seno, and H. Matsuda. 2002. A population dynamic model for facultative  
850 agamosperms. *Journal of Theoretical Biology* 215:253–262.
- 851 Oswald, B. P., and S. L. Nuismer. 2011. A unified model of autopolyploid establishment and  
852 evolution. *The American Naturalist* 178:687–700.
- 853 Otto, S. P., and J. Whitton. 2000. Polyploid incidence and evolution. *Annual Review of Genetics*  
854 34:401–437.

- 855 Pan, J. J., and J. S. Price. 2002. Fitness and evolution in clonal plants: the impact of clonal  
856 growth. Pages 361–378 in J. F. Stuefer, B. Erschbamer, H. Huber, and J.-I. Suzuki, eds.  
857 Ecology and Evolutionary Biology of Clonal Plants. Springer Netherlands, Dordrecht.
- 858 Pannell, J. R., J. R. Auld, Y. Brandvain, M. Burd, J. W. Busch, P. Cheptou, J. K. Conner, et al.  
859 2015. The scope of Baker’s law. *New Phytologist* 208:656–667.
- 860 R Development Core Team. 2019. R: a language and environment for statistical computing  
861 (v.3.6.2). Vienna, Austria: R Foundation for Statistical Computing.
- 862 Ramsey, J., and T. S. Ramsey. 2014. Ecological studies of polyploidy in the 100 years following  
863 its discovery. *Philosophical Transactions of the Royal Society B: Biological Sciences*  
864 369:20130352.
- 865 Ramsey, J., and D. W. Schemske. 1998. Pathways, mechanisms, and rates of polyploid formation  
866 in flowering plants. *Annual Review of Ecology and Systematics* 29:467–501.
- 867 ———. 2002. Neopolyploidy in flowering plants. *Annual Review of Ecology and Systematics*  
868 3:589–639.
- 869 Rausch, J. H., and M. T. Morgan. 2005. The effect of self-fertilization, inbreeding depression,  
870 and population size on autopolyploid establishment. *Evolution* 59:1867–1875.
- 871 Rice, A., P. Šmarda, M. Novosolov, M. Drori, L. Glick, N. Sabath, S. Meiri, et al. 2019. The  
872 global biogeography of polyploid plants. *Nature Ecology & Evolution* 3:265–273.
- 873 Rodríguez, D. J. 1996. A model for the establishment of polyploidy in plants: Viable but infertile  
874 hybrids, iteroparity, and demographic stochasticity. *Journal of Theoretical Biology* 180:189–  
875 196.
- 876 Scherrer, D., P. Stoll, and J. Stöcklin. 2017. Colonization dynamics of a clonal pioneer plant on a  
877 glacier foreland inferred from spatially explicit and size-structured matrix models. *Folia*  
878 *Geobotanica* 52:353–366.
- 879 Simón-Porcar, V. I., J. L. Silva, S. Meeus, J. D. Higgins, and M. Vallejo-Marín. 2017. Recent  
880 autopolyploidization in a naturalized population of *Mimulus guttatus* (Phrymaceae). *Botanical*  
881 *Journal of the Linnean Society*.
- 882 Soltis, D. E., B. B. Misra, S. Shan, S. Chen, and P. S. Soltis. 2016a. Polyploidy and the  
883 proteome. *Biochimica et Biophysica Acta (BBA) - Proteins and Proteomics* 1864:896–907.
- 884 Soltis, D. E., C. J. Visger, D. B. Marchant, and P. S. Soltis. 2016b. Polyploidy: Pitfalls and paths  
885 to a paradigm. *American Journal of Botany* 103:1146–1166.
- 886 Spoelhof, J. P., D. E. Soltis, and P. S. Soltis. 2020. Habitat shape affects polyploid establishment  
887 in a spatial, stochastic model. *Frontiers in Plant Science* 11:592356.

- 888 Spoelhof, J. P., P. S. Soltis, and D. E. Soltis. 2017. Pure polyploidy: Closing the gaps in  
889 autopolyploid research. *Journal of Systematics and Evolution* 55:340–352.
- 890 Stebbins, G. L. 1950. *Variation and evolution in plants*. Columbia University Press, New York.
- 891 Sutherland, B. L., T. Miranda-Katz, and L. F. Galloway. 2020. Strength in numbers? Cytotype  
892 frequency mediates effect of reproductive barriers in mixed-ploidy arrays. *Evolution*  
893 74:2281–2292.
- 894 Thompson, J. D., and R. Lumaret. 1992. The evolutionary dynamics of polyploid plants: Origins,  
895 establishment and persistence. *Trends in Ecology and Evolution* 7:302–307.
- 896 Vallejo-Marín, M., M. E. Dorken, and S. C. H. Barrett. 2010. The ecological and evolutionary  
897 consequences of clonality for plant mating. *Annual Review of Ecology, Evolution, and*  
898 *Systematics* 41:193–213.
- 899 Vamosi, J. C., S. J. Goring, B. F. Kennedy, R. J. Mayberry, C. M. Moray, L. A. Neame, N. D.  
900 Tunbridge, et al. 2007. Pollination, floral display, and the ecological correlates of polyploidy.  
901 *Functional Ecosystems and Communities* 1:1–9.
- 902 Van Drunen, W. E., and B. C. Husband. 2018a. Whole-genome duplication decreases clonal  
903 stolon production and genet size in the wild strawberry *Fragaria vesca*. *American Journal of*  
904 *Botany* 105:1712–1724.
- 905 Van Drunen, W. E., and B. C. Husband. 2018b. Immediate vs. evolutionary consequences of  
906 polyploidy on clonal reproduction in an autopolyploid plant. *Annals of Botany* 122:195–205.
- 907 Van Drunen, W. E., and B. C. Husband. 2019. Evolutionary associations between polyploidy,  
908 clonal reproduction, and perenniality in the angiosperms. *New Phytologist* 224:1266–1277.
- 909 Van Drunen, W. E., M. van Kleunen, and M. E. Dorken. 2015. Consequences of clonality for  
910 sexual fitness: Clonal expansion enhances fitness under spatially restricted dispersal.  
911 *Proceedings of the National Academy of Sciences* 112:8929–8936.
- 912 Vandepitte, K., T. De Meyer, H. Jacquemyn, I. Roldán-Ruiz, and O. Honnay. 2013. The impact  
913 of extensive clonal growth on fine-scale mating patterns: a full paternity analysis of a lily-of-  
914 the-valley population (*Convallaria majalis*). *Annals of Botany* 111:623–628.
- 915 Vandepitte, K., I. Roldán-Ruiz, H. Jacquemyn, and O. Honnay. 2010. Extremely low genotypic  
916 diversity and sexual reproduction in isolated populations of the self-incompatible lily-of-the-  
917 valley (*Convallaria majalis*) and the role of the local forest environment. *Annals of Botany*  
918 105:769–776.
- 919 Walczyk, A. M., and E. I. Hersch-Green. 2019. Impacts of soil nitrogen and phosphorus levels  
920 on cytotype performance of the circumboreal herb *Chamerion angustifolium* : implications for  
921 polyploid establishment. *American Journal of Botany* 106:906–921.

- 922 Winkler, E., and M. Fischer. 2001. The role of vegetative spread and seed dispersal for optimal  
923 life histories of clonal plants: a simulation study. *Evolutionary Ecology* 15:281–301.
- 924 Winkler, E., and J. Stöcklin. 2002. Sexual and vegetative reproduction of *Hieracium pilosella* L.  
925 under competition and disturbance: A grid-based simulation model. *Annals of Botany*  
926 89:525–536.
- 927 Wood, T. E., N. Takebayashi, M. S. Barker, I. Mayrose, P. B. Greenspoon, and L. H. Rieseberg.  
928 2009. The frequency of polyploid speciation in vascular plants. *Proceedings of the National*  
929 *Academy of Sciences* 106:13875–13879.
- 930 Yamauchi, A. 2006. Formulation of competition between sexual and selfing forms. *Evolution*  
931 60:1952–1953.
- 932 Yamauchi, A., A. Hosokawa, H. Nagata, and M. Shimoda. 2004. Triploid bridge and role of  
933 parthenogenesis in the evolution of autopolyploidy. *The American Naturalist* 164:101–112.
- 934 Yu, L., C. Boström, S. Franzenburg, T. Bayer, T. Dagan, and T. B. H. Reusch. 2020. Somatic  
935 genetic drift and multilevel selection in a clonal seagrass. *Nature Ecology & Evolution* 4:952–  
936 962.
- 937

938 **FIGURES**  
 939  
 940

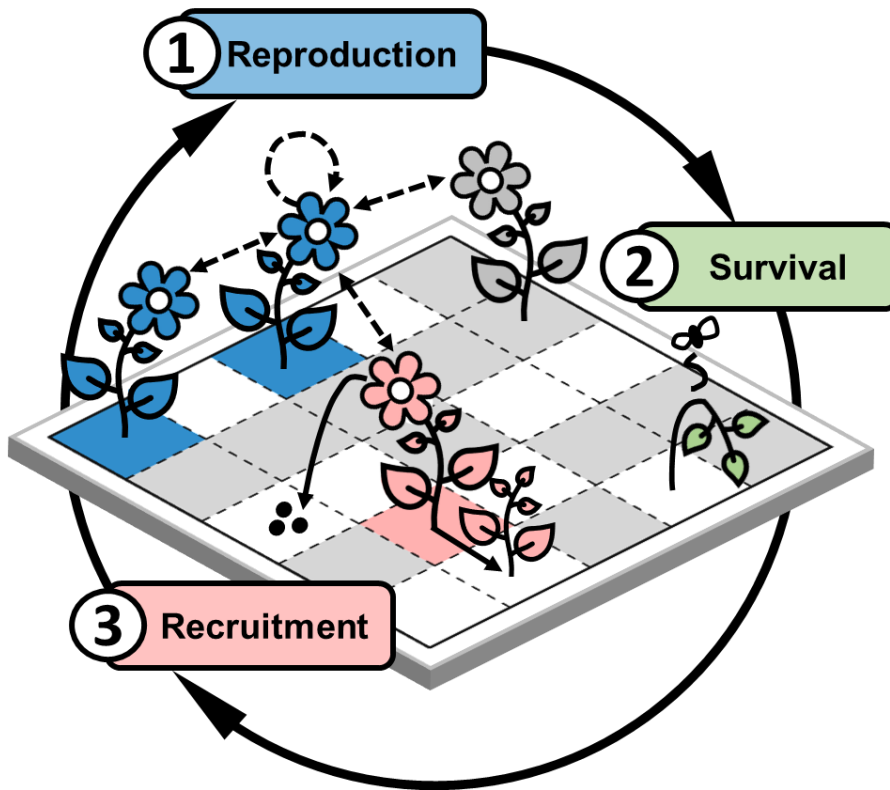

| Parameter | Description                        | Values        |
|-----------|------------------------------------|---------------|
| $D$       | Lattice dimensions                 | 30            |
| $N$       | Population size                    | 900           |
| $t$       | Initial number of polyploids       | 1             |
| $ov$      | Ovule number                       | 5             |
| $d_p$     | Average pollen dispersal           | 0.5, 2, 5     |
| $ug$      | Unreduced gametes                  | 0 – 0.2       |
| $k_2$     | 2x selfed-seed inviability         | 0.1, 0.5, 0.9 |
| $k_4$     | 4x selfed-seed inviability         | 0.1, 0.5, 0.9 |
| $c_2$     | 2x per generation ramet production | 0, 1, 5       |
| $c_4$     | 4x per generation ramet production | 0, 1, 5       |
| $sv_2$    | 2x per generation survival         | 0 - 0.9       |
| $sv_4$    | 4x per generation survival         | 0 - 0.9       |
| $d_s$     | Average seed dispersal             | 0.5, 2, 5     |
| $d_{c2}$  | 2x average ramet dispersal         | 0.5, 5        |
| $d_{c4}$  | 4x average ramet dispersal         | 0.5, 5        |

941  
 942  
 943 **Figure 1:** Simulation model workflow, and the adjustable parameters associated with each of the three main steps per generation.  
 944 Models are initiated on a  $D \times D$  population lattice containing both tetraploids ( $t$  individuals, 4x, coloured cells) and diploids ( $N - t$   
 945 individuals, 2x, grey cells), where each lattice cell can hold one individual. In Step 1, pollen is dispersed (dashed lines) within shoot,  
 946 between shoots in the same genet (blue tetraploid genet), between members of the same cytotype (blue and pink tetraploids), and  
 947 between cytotypes (blue tetraploid and grey diploid). Seeds are fertilized, and clonal ramets are produced. Individuals die in Step 2  
 948 according to their survival probability, leaving empty spaces in the population (white cells). In Step 3, empty cells are colonized by  
 949 newly produced seeds or ramets. The surviving individuals and the new cohort of recruits then repeat this cycle, which continues for a  
 950 specified number of generations. See the main text for more detail.

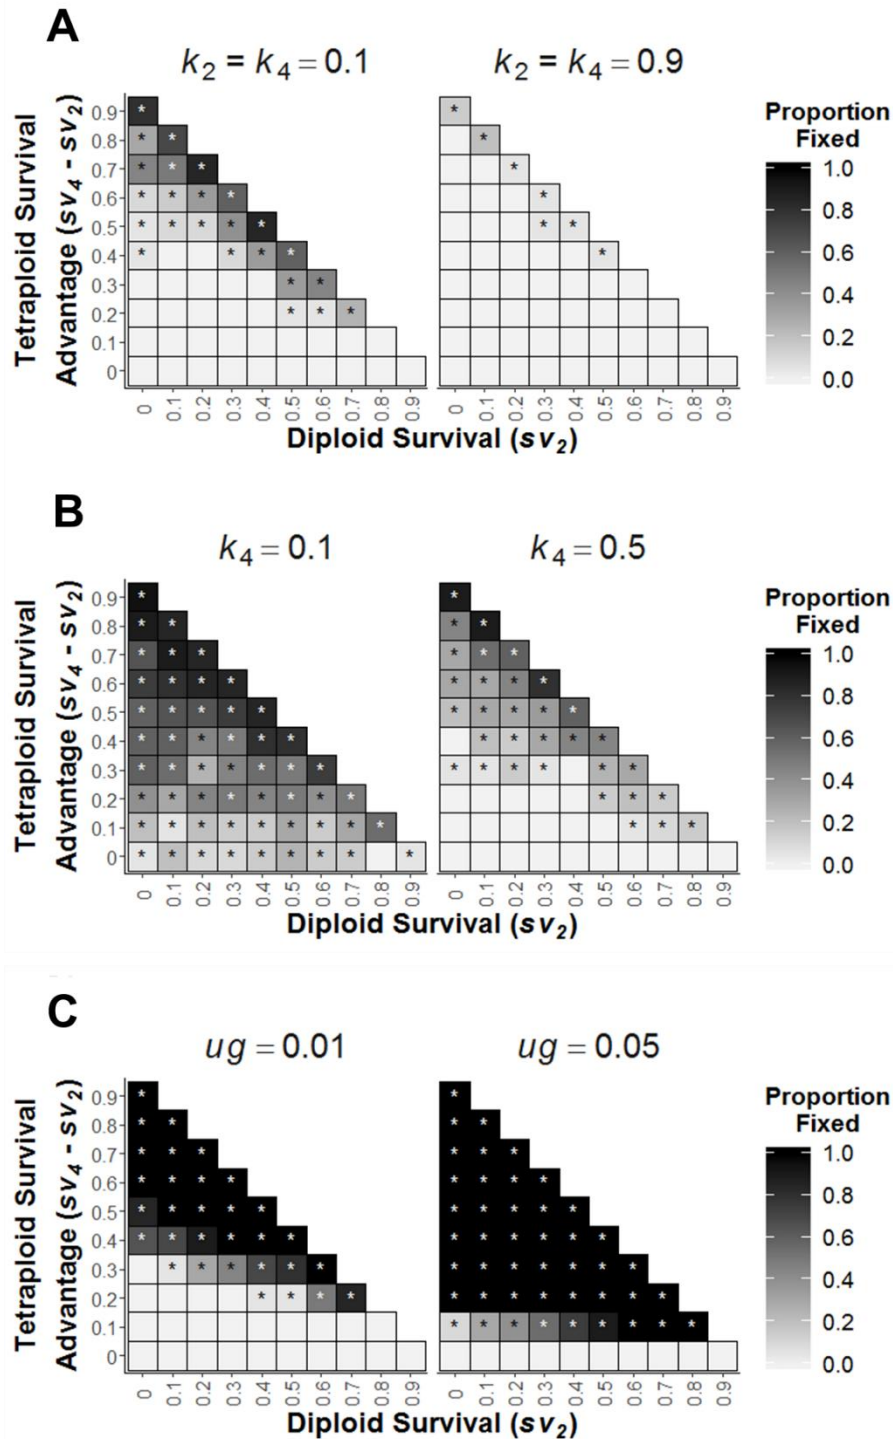

951  
952

953 **Figure 2:** Effect of life history strategy on polyploid establishment for a range of diploid and tetraploid  
 954 survival probabilities ( $sv_2$ ,  $sv_4$ ). Establishment success is measured as the proportion of simulation  
 955 replicates in which tetraploids spread to fixation, and exclude diploids from the population. Panel A  
 956 shows establishment under equal selfed seed inviability ( $k_2 = k_4$ ), while in Panel B tetraploid selfed-  
 957 seed inviability is lower than diploids ( $k_2 = 0.9$ ,  $k_4$  value above panels). There is no unreduced gamete  
 958 production in Panels A and B ( $ug = 0$ ). In Panel C, unreduced gamete production is non-zero, and  
 959 selfed-seed inviability is  $k_2 = k_4 = 0.1$ . Asterisks denote parameter combinations where at least one  
 960 simulation replicate resulted in tetraploid fixation. For all models  $d_p = d_s = 0.5$ .



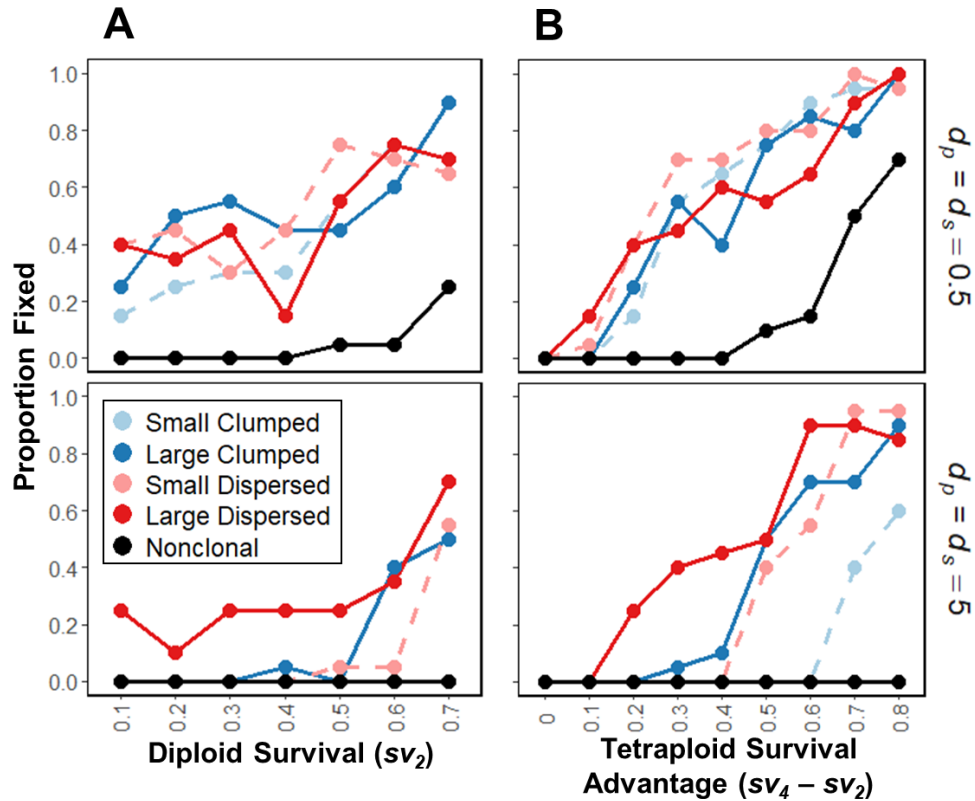

961  
 962 **Figure 3:** Influence of interactions between clonal strategy and life history on polyploid  
 963 establishment, when cytotypes have identical clonal architectures (*Clumped*  $d_{c2} = d_{c4} = 0.5$ , blue;  
 964 *Dispersed*  $d_{c2} = d_{c4} = 5$ , red), and equal ramet production (genets are *Small*  $c_2 = c_4 = 1$ , light  
 965 dashed lines; or *Large*  $c_2 = c_4 = 5$ , dark solid lines). In Panel A diploid survival probability ( $sv_2$ )  
 966 takes the values on the x-axis and tetraploid survival ( $sv_4$ ) is 0.2 higher. In panel B diploid  
 967 survival ( $sv_2$ ) is held at 0.1, and tetraploids have a survival advantage ( $sv_4 - sv_2$ ) according to the  
 968 x-axis. Average pollen ( $d_p$ ) and seed ( $d_s$ ) dispersal distances vary between rows in each panel. For  
 969 all models, selfed-seed inviability is equal between cytotypes ( $k_2 = k_4 = 0.1$ ), and there is no  
 970 unreduced gamete production ( $ug = 0$ ).

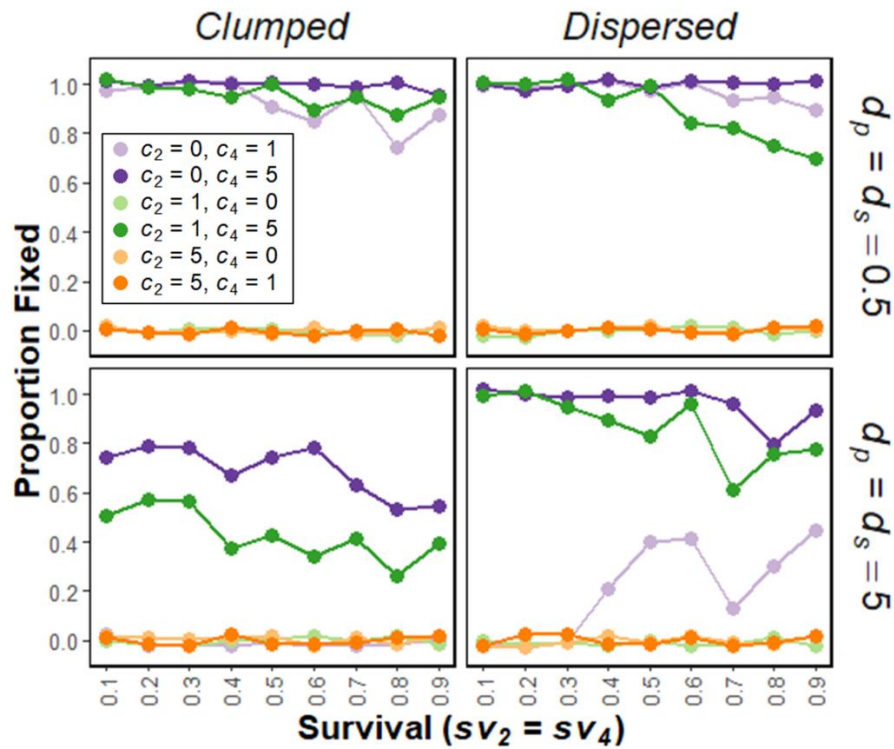

971  
972  
973  
974  
975  
976  
977  
978  
979  
980  
981  
982  
983  
984

**Figure 4:** Polyloid establishment probability when diploids and tetraploids have unequal ramet production (i.e., unequal genet size,  $c_2 \neq c_4$ ). In comparison to diploids, tetraploids can produce a few more ramets ( $c_2 = 0, c_4 = 1$ ; light purple lines), many more ramets ( $c_2 = 0$  or  $1, c_4 = 5$ ; dark purple and dark green lines), fewer ramets ( $c_2 = 5, c_4 = 1$ ; dark orange lines), or no ramets ( $c_2 = 1$  or  $5, c_4 = 0$ ; light green and light orange lines). Clonal architecture is the same for both cytotypes, with the *Clumped* strategy in the left column ( $d_{C2} = d_{C4} = 0.5$ ), and the *Dispersed* strategy in the right column ( $d_{C2} = d_{C4} = 5$ ). Average pollen and seed dispersal distances ( $d_p = d_s$ ) varies between rows. Life history strategies are equal between cytotypes ( $sv_2 = sv_4$ ), as shown on the x-axis. For all models, selfed-seed inviability is equal between cytotypes ( $k_2 = k_4 = 0.1$ ), and there is no unreduced gamete production ( $ug = 0$ ). Points are slightly jittered vertically.

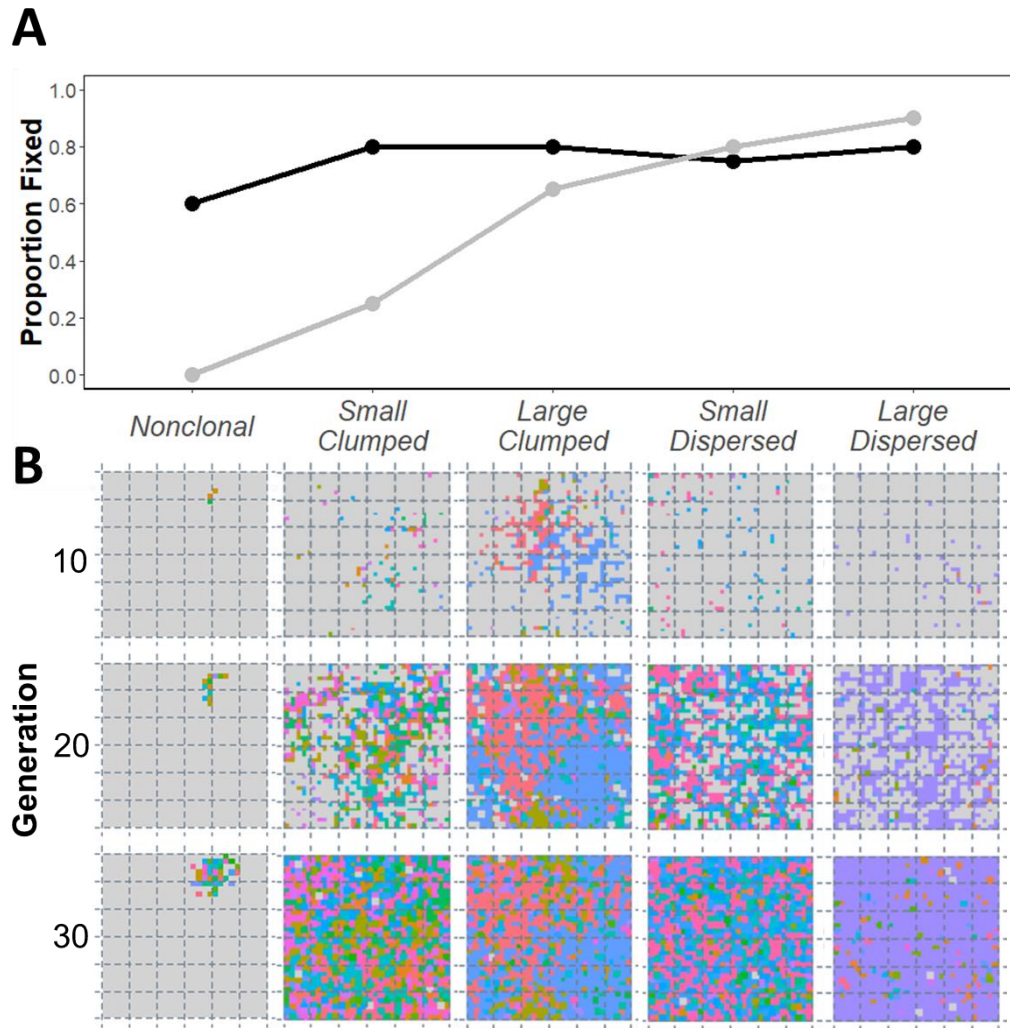

985  
986

987 **Figure 5:** Contrasting the spread and establishment probability of nonclonal tetraploids and each clonal  
 988 strategy. Panel A shows the proportion of simulations with successful polyploid establishment between  
 989 nonclonal and clonal strategies (black  $d_p = d_s = 0.5$ , grey  $d_p = d_s = 5$ ). Cytotypes have identical  
 990 architecture (*Clumped*  $d_{C2} = d_{C4} = 0.5$ ; *Dispersed*  $d_{C2} = d_{C4} = 5$ ), and equal ramet production (genets are  
 991 *Small*  $c_2 = c_4 = 1$ ; or *Large*  $c_2 = c_4 = 5$ ). In Panel B, tetraploids (coloured cells) expand into the 2-  
 992 dimensional population of diploids (grey cells), for  $d_p = 0.5$  (black line in A). Each colour represents a  
 993 different tetraploid genet. For all models,  $sv_2 = 0.5$ ,  $sv_4 = 0.9$ , selfed-seed inviability is equal between  
 994 cytotypes ( $k_2 = k_4 = 0.1$ ), and there is no unreduced gamete production ( $ug = 0$ ).  
 995

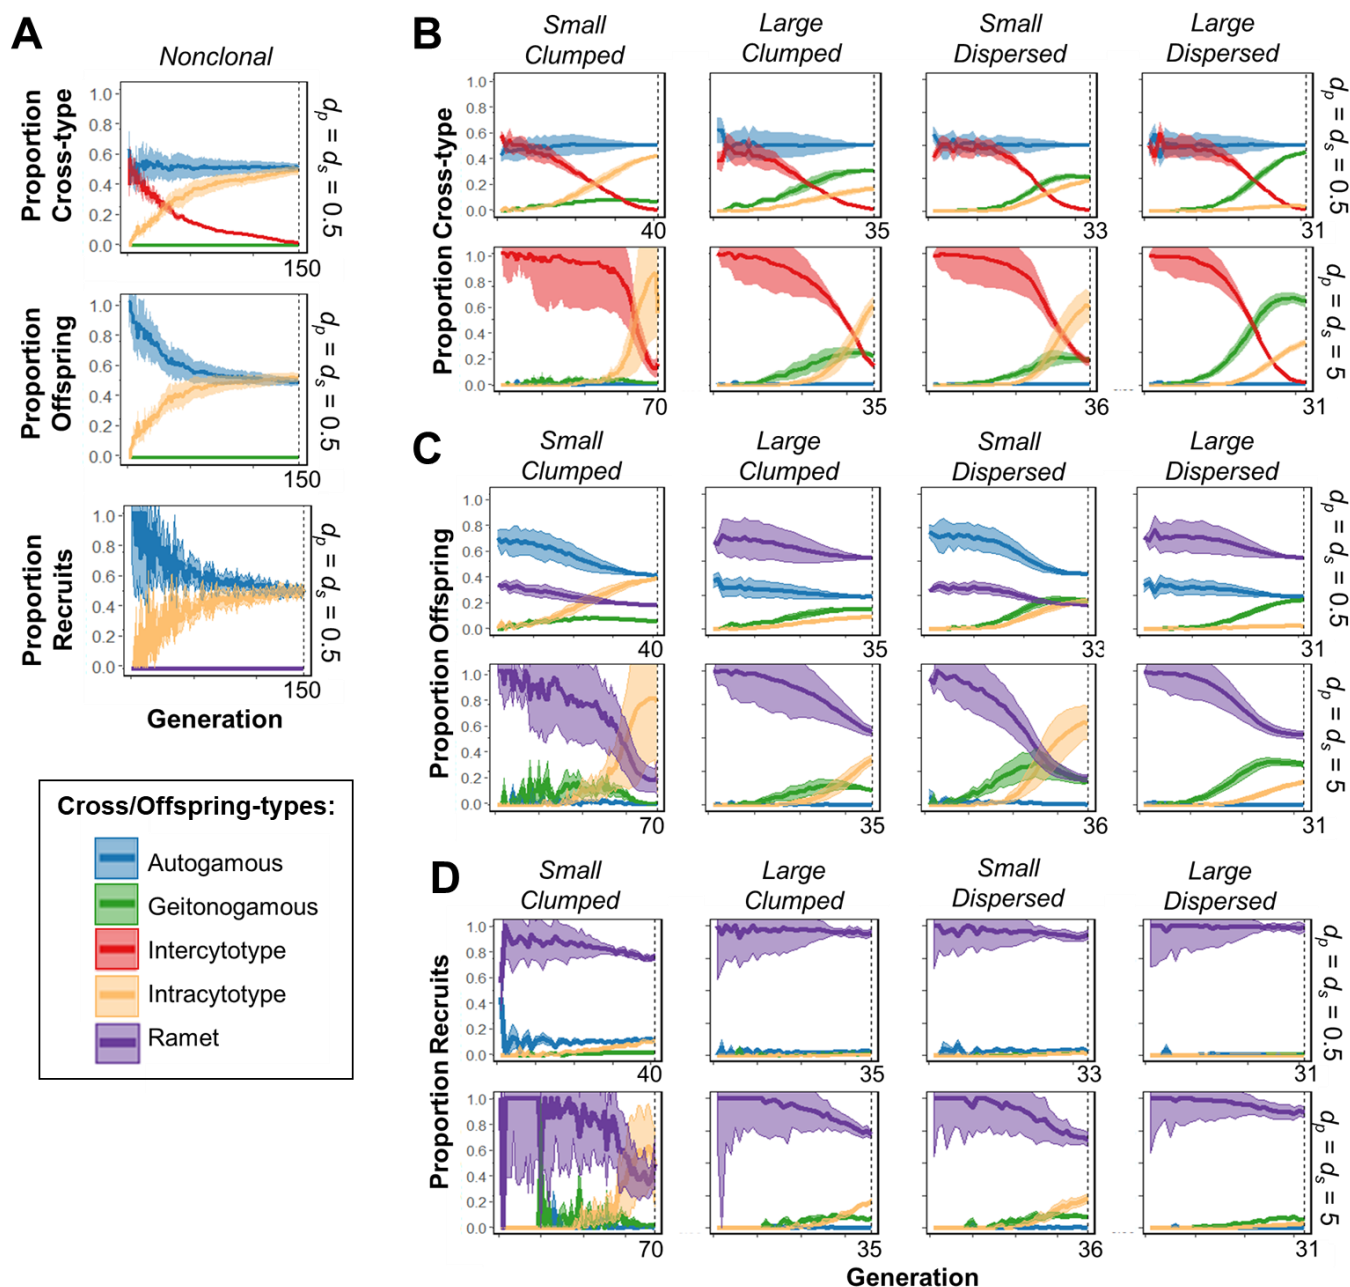

996  
997  
998  
999  
1000  
1001  
1002  
1003  
1004  
1005  
1006  
1007  
1008  
1009  
1010

**Figure 6:** Mating outcomes and offspring recruitment during polyploid establishment, averaged ( $\pm$  SE) across simulation replicates per generation. Tetraploid mating events in Panel A (nonclonal) and Panel B (clonal) can result in four cross-types: autogamous self-fertilization (blue, cross-types #16-17 in Table S1), geitonogamous self-fertilization (green, #18-19), intercytype mating (red, #20), or intracytype mating (yellow, #22). The recruitment pool in Panel A (nonclonal) and Panel C (clonal) contains any viable sexual offspring and clonal ramets (purple) produced, which may then be recruited into the population as shown in Panel A (nonclonal) and Panel D (clonal). In Panel A all scenarios have  $d_p = 0.5$ , as no establishment occurred when  $d_p = 5$ . In Panels B - D, clonal strategy varies across columns, and average pollen and seed dispersal distance ( $d_p = d_s$ ) varies between rows. Cytotypes have identical architecture (*Clumped*  $d_{C2} = d_{C4} = 0.5$ ; *Dispersed*  $d_{C2} = d_{C4} = 5$ ), and equal ramet production (genets are *Small*  $c_2 = c_4 = 1$ ; or *Large*  $c_2 = c_4 = 5$ ). For all models,  $sv_2 = 0.5$ ,  $sv_4 = 0.9$ , selfed-seed inviability is equal between cytotypes ( $k_2 = k_4 = 0.1$ ), and there is no unreduced gamete production ( $ug = 0$ ). Generations are truncated at the fastest tetraploid fixation time per parameter combination, indicated on the bottom right of each panel.
